# 1 Estimating recent migration and population size surfaces

2 Hussein Al-Asadi\*<sup>1,2</sup>, Desislava Petkova<sup>3</sup>, Matthew Stephens\*<sup>2,4</sup>, and John  
3 Novembre\*<sup>1,4</sup>

4 <sup>1</sup>Committee on Evolutionary Biology, University of Chicago

5 <sup>2</sup>Department of Statistics, University of Chicago

6 <sup>3</sup>Department of Statistics, Oxford University

7 <sup>4</sup>Department of Human Genetics, University of Chicago

8 to whom correspondence shall be addressed\*

9 July 9, 2018

## 10 Abstract

11 In many species a fundamental feature of genetic diversity is that genetic similarity  
12 decays with geographic distance; however, this relationship is often complex, and may  
13 vary across space and time. Methods to uncover and visualize such relationships have  
14 widespread use for analyses in molecular ecology, conservation genetics, evolutionary  
15 genetics, and human genetics. While several frameworks exist, a promising approach  
16 is to infer maps of how migration rates vary across geographic space. Such maps  
17 could, in principle, be estimated across time to reveal the full complexity of population  
18 histories. Here, we take a step in this direction: we present a method to infer separate  
19 maps of population sizes and migration rates for different time periods from a matrix  
20 of genetic similarity between every pair of individuals. Specifically, genetic similarity is  
21 measured by counting the number of long segments of haplotype sharing (also known  
22 as identity-by-descent tracts). By varying the length of these segments we obtain  
23 parameter estimates for qualitatively different time periods. Using simulations, we  
24 show that the method can reveal time-varying migration rates and population sizes,  
25 including changes that are not detectable when ignoring haplotypic structure. We  
26 apply the method to a dataset of contemporary European individuals (POPRES),  
27 and provide an integrated analysis of recent population structure and growth over  
28 the last ~3,000 years in Europe. Software implementing the methods is available at  
29 <https://github.com/halasaki/MAPS>.

## 30 1 Introduction

31 Populations exist on a physical landscape and often have limited dispersal. As a result,  
32 most genetic data exhibit a pattern of isolation by distance (Wright, 1943), which is simply  
33 to say that populations closer to each other geographically are more similar genetically.  
34 Furthermore, the degree of isolation by distance can vary across space and time (Manel  
35 et al., 2003). For instance, in a mountainous area of a terrestrial species’ range, a pair of  
36 individuals may be more divergent from each other than a pair of individuals separated by  
37 the same distance in a flat and open area of the habitat. Additionally, the degree of isolation  
38 by distance can change over time – for example, if dispersal patterns are changing over time.  
39 Such spatial and temporal heterogeneity is an important aspect of population biology, and  
40 understanding it is crucial to solving problems in ecology (Turner et al., 2001), conservation  
41 genetics (Segelbacher et al., 2010), evolution (Rousset, 2004), and human genetics (Rosenberg  
42 et al., 2005).

43 Several methods have been developed to reveal spatial heterogeneity in patterns of isola-  
44 tion by distance (Womble, 1951; Barbujani et al., 1989; Guillot et al., 2005, 2009; Caye et al.,  
45 2016; Petkova et al., 2016; Bradburd et al., 2016, 2017). Some methods are based on ex-  
46 plicitly modeling the spatial structure in the data (Guillot et al., 2005, 2009; Petkova et al.,  
47 2016; Bradburd et al., 2016, 2017); others take non-parametric approaches (e.g. Womble,  
48 1951; Barbujani et al., 1989); while other methods ignore the spatial configuration of the  
49 samples and rely on researchers to make a *post hoc* geographic interpretation of the results  
50 (e.g. Pritchard et al., 2000; Patterson et al., 2006). However, none of these methods can be  
51 flexibly applied to address temporal heterogeneity in isolation by distance patterns, and new  
52 methods are needed.

53 One source of information for inferring changes in demography across time is the density  
54 of mutations observed in pairwise sequence comparisons (Li and Durbin, 2011; Schraiber  
55 and Akey, 2015). For example, when individuals are similar along a long segment of their  
56 chromosomes, it suggests that these segments share a recent common ancestor (Palamara  
57 et al., 2012). These segments are often called “identity-by-descent” tracts, although here we  
58 prefer the term “long pairwise shared coalescence” (IPSC) segments (as identity by descent  
59 traditionally required a definition of a founder generation, which is not clear in most data  
60 applications). A key feature of these segments is that filtering them by length provides a  
61 means to interrogate different periods of population history. The longest segments reflect  
62 the most recent population history, whereas shorter segments reflect longer periods of time.  
63 Recent analyses using IPSC segments suggest that they can reveal fine-scale spatial and  
64 temporal patterns of population structure that are not evident with genotype-based methods

65 such as principal components analysis (Ralph and Coop, 2013; Lawson et al., 2012; Leslie  
66 et al., 2015).

67 Here we develop a new method to infer spatial and temporal heterogeneity in population  
68 sizes and migration rates. The method takes as input geographic coordinates for a set of  
69 individuals sampled across a spatial landscape, and a matrix of their genetic similarities as  
70 measured by sharing of IPSC segments. It then infers two maps, one representing dispersal  
71 rates across the landscape, and another representing population density. Crucially, building  
72 these maps using different lengths of IPSC segments can help reveal changes in dispersal  
73 rates and population sizes over time.

74 Our method is based on a stepping-stone model where randomly-mating subpopulations  
75 are connected to neighboring subpopulations in a grid. Such models are parameterized  
76 by a vector of population sizes ( $\vec{N}$ ) and a sparse migration rate matrix ( $\mathbf{M}$ ). Stepping-  
77 stone models with a large number of demes can approximate spatially continuous population  
78 models (Barton et al., 2002; Baharian et al., 2016), and this can be exploited to produce  
79 maps of approximate dispersal rates and population density across continuous space.

80 Our method builds upon a method developed for estimating effective migration surfaces  
81 (EEMS) (Petkova et al., 2016). While EEMS infers local rates of effective migration relative  
82 to a global average, here we can explicitly infer absolute parameter values by leveraging IPSC  
83 segments and modeling the recombination process [ $\vec{N}$  and  $\mathbf{M}$  values in the stepping-stone  
84 model, and effective spatial density function  $D_e(\vec{x})$  and dispersal rate function  $\sigma(\vec{x})$  in the  
85 continuous limit]. We call this method MAPS, for inferring Migration And Population-size  
86 Surfaces.

87 We test MAPS on coalescent simulations and apply it to a European subset of 2,224  
88 individuals from the POPRES data (Nelson et al., 2008). In simulations, we show that MAPS  
89 can infer both time-resolved migration barriers and population sizes across the habitat. In  
90 empirical data, we infer dispersal rates  $\sigma(\vec{x})$  and population densities  $D_e(\vec{x})$  across different  
91 time periods in Europe.

## 92 2 Results

### 93 2.1 Outline of the MAPS method

94 MAPS estimates demography using the number of Pairwise Shared Coalescence (PSC) seg-  
95 ments of different lengths shared between individuals. We define a PSC segment between  
96 (haploid) individuals to be a genomic segment with a single coalescent time across its length  
97 (Figure 1A). Long PSC (IPSC) segments tend to have a recent coalescent time, and so man-

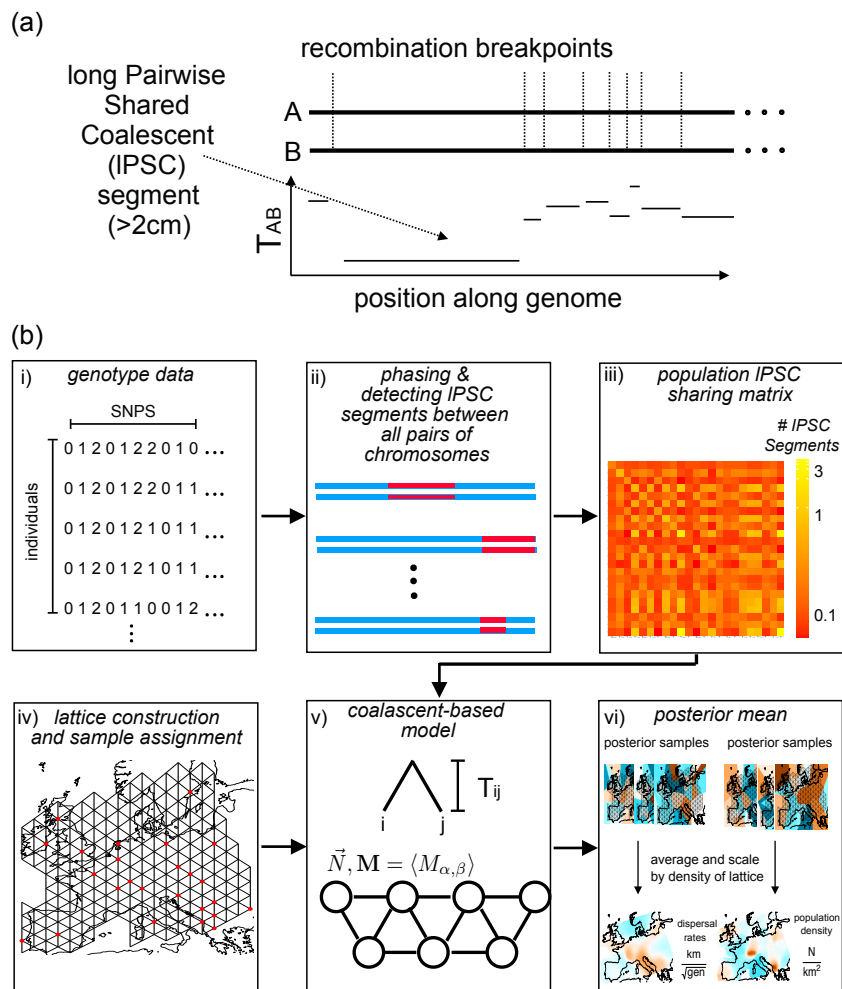

Figure 1: **Schematic overview of MAPS.** (a) Coalescent times between a pair of haplotypes (A and B) will vary across the genome in discrete segments bordered by recombination breakpoints. On average, longer segments represent shorter pairwise coalescent times ( $T_{AB}$ ) (b) Flow diagram of MAPS. i) We start with a matrix of called genotypes; ii) IPSC segments between all pairs of chromosomes across the genome are identified from the data using external methods (such as BEAGLE, Browning and Browning (2011)); iii) IPSC segments between pairs of individuals are aggregated at the levels of pairs of populations; iv) A grid is constructed and individuals are assigned to the most nearby node; v) The probability of the PSC sharing matrix can be computed under a stepping-stone model where each node represents a population and each edge represents symmetric migration; vi) We use an MCMC scheme to sample from the posterior distribution of migration rates and population sizes. The final MAPS output is the mean over these posterior samples, and the averaged rates can be transformed to units of dispersal rate and population density. The diagram does not show a bootstrapping step used to estimate likelihood weights to account for correlations between IPSC segments, see Equation (6) in Methods.

ifest themselves in genotype data as unusually long regions of high pairwise similarity, which can be detected by various software packages (Gusev et al., 2009; Browning and Browning, 2011, 2013; Chiang et al., 2016). Because IPSC segments typically reflect recent coalescent events, counts of IPSC segments are especially informative for recent population structure (Ringbauer et al., 2017; Palamara et al., 2012; Baharian et al., 2016). And partitioning IPSC segments into different lengths bins (e.g. 2-8cM,  $\geq 8$ cM) can help focus inference on different (recent) temporal scales.

The MAPS model involves two components: i) a likelihood function, which relates the observed data (genetic similarities, as measured by sharing of IPSC segments) to the underlying demographic parameters (migration rates and population sizes); and ii) a prior distribution on the demographic parameters, which captures the idea that nearby locations will often have similar demographic parameters. The likelihood function comes from a coalescent-based “stepping-stone” model in which discrete populations (demes) arranged on a spatial grid exchange migrants with their neighbors (Figure 1b). The parameters of this model are the migration rates between neighboring demes ( $M_{\alpha,\beta}$ ) and the population sizes within each deme ( $N_\alpha$ ). The prior distribution is similar to that from Petkova et al. (2016), and is based on partitioning the habitat into cells using Voronoi tessellations (one for migration and one for population size), and assuming that migration rates (or population sizes) are constant in each cell. We use an MCMC scheme to sample from the posterior distribution on the model parameters (migration rates, population sizes, and Voronoi cell configurations). We can summarize these results by surfaces showing the posterior means of demographic parameters across the habitat.

The inferred migration rates and population sizes will depend on the density of the grid used. However, using ideas from Barton et al. (2002) and Baharian et al. (2016) we convert them to corresponding parameters in continuous space, whose interpretation is independent of the grid for suitably dense grids. Specifically, we convert the migration rates to a spatial diffusion parameter  $\sigma(\vec{x})$ , often referred to as the “root mean square dispersal distance”, which can be interpreted roughly as the expected distance an individual disperses in one generation; and we convert the population sizes ( $\vec{N}$ ) to an “effective population density”  $D_e(\vec{x})$  which can be interpreted as the number of individuals per square kilometer. Similar to the original grid-based demographic parameters, we can summarize MAPS results by surfaces showing the posterior means of  $\sigma(\vec{x})$  and  $D_e(\vec{x})$  across the habitat.

## 130 2.2 Differences from EEMS

131 Our MAPS approach is closely related to the EEMS method from [Petkova et al. \(2016\)](#),  
132 but there are some important differences. First, the MAPS likelihood is based on IPSC  
133 sharing, rather than a simple average genetic distance across markers. This was primarily  
134 motivated by the fact that, by considering IPSC segments in different length bins, MAPS  
135 can interrogate demographic parameters across different recent time periods. However, this  
136 change also allows MAPS, in principle, to estimate absolute values for the parameters  $\mathbf{M}$  and  
137  $\vec{N}$ , whereas EEMS can estimate only “effective” parameters which represent the combined  
138 effects of  $\mathbf{M}$  and  $\vec{N}$ . This ability of MAPS to estimate absolute values stems from its use of  
139 a known recombination map, which acts as an independent clock to calibrate the decay of  
140 PSC segments. Finally, MAPS uses a coalescent model, whereas [Petkova et al. \(2016\)](#) uses  
141 a resistance distance approximation ([McRae, 2006](#)).

## 142 2.3 Evaluation of performance under a stepping-stone coalescent 143 model

144 We assess the performance of MAPS with several simulations, and compare and contrast the  
145 results with EEMS. We used the program MACS ([Chen et al., 2009](#)) to simulate data under  
146 a coalescent stepping stone model and refinedIBD ([Browning and Browning, 2011, 2013](#))  
147 to identify IPSC segments. All simulations involved twenty demes, each containing 10,000  
148 diploid individuals, and each exchanging migrants with their neighbors. We analyzed each  
149 simulated data set using PSC segments of length 2-6cM and  $\geq 6$ cM, which correspond to  
150 time-scales of approximately 50 generations and 12.5 generations respectively (see Lemma  
151 5.3 in the Supplementary Note). Results for other length bins are qualitatively similar  
152 (Supplementary Figure [S1](#) & [S2](#)).

### 153 Migration Rate Inference

154 First, we simulated under a uniform (constant) migration surface with migration rate 0.01  
155 (Figure [2a](#)), assumed to have stayed constant over time. In this case both EEMS and MAPS  
156 correctly infer uniform migration (Figure [2a](#)), and MAPS provides accurate estimates of the  
157 migration rate (posterior mean 0.010 when using segments 2-6cM and 0.0086 using segments  
158  $\geq 6$ cM). As noted earlier, EEMS does not estimate the absolute migration rate; it estimates  
159 only the *relative* (effective) migration rates.

160 Next, we considered a scenario where the migration surface changed across time. Specifi-  
161 cally the migration surface matches the constant migration scenario (above) until 10 genera-

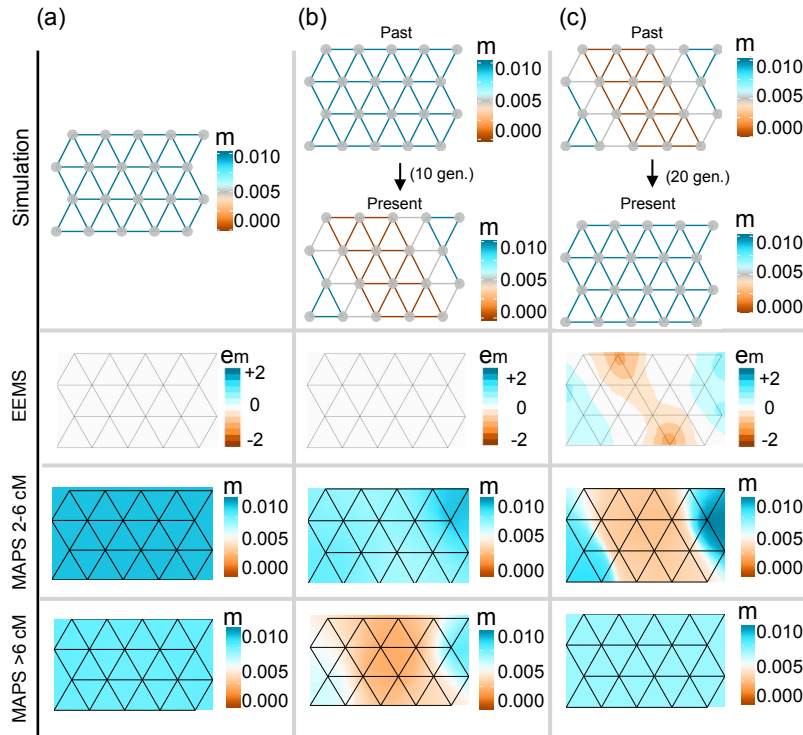

Figure 2: **Simulations comparing migration rates inferred with MAPS against effective migration rates inferred with EEMS.** (a) We simulated data under uniform migration rates equal to 0.01 and applied EEMS and MAPS using PSC segments in the range 2-6cM and  $\geq 6$ cM. Like EEMS, MAPS correctly infers a uniform migration surface. Additionally, MAPS provides accurate estimates of the migration rates for both PSC segments 2-6cM (mean 0.01) and PSC segments  $\geq 6$ cM (mean 0.0086). (b) We simulated a recent sudden migration barrier formation 10 generations ago. Here, EEMS is unable to infer a barrier, while MAPS correctly infers the historical uniform surface (2-6cM) and a barrier in the more recent time scale ( $\geq 6$ cM). (c) We simulated a long-standing migration barrier that recently dissipated 20 generations ago. EEMS infers a barrier, while MAPS correctly infers both the historical migration barrier (2-6cM) and the uniform migration surface in the more recent time scale ( $\geq 6$ cM). In all cases shown here, we simulated a 20 deme stepping stone model such that the population sizes all equal to 10,000, and 10 diploid individuals were sampled at each deme.

162 tions ago, when a complete barrier to gene flow instantaneously arose (a “vicariance event”,  
163 Figure 2b). In this setting EEMS again infers a uniform migration surface. This is because  
164 EEMS is based on pairwise genetic distances, which are negligibly influenced by the recent  
165 barrier. In contrast, by applying MAPS with different PSC segment lengths, we can see  
166 both the historically uniform migration surface (for segments 2-6cM) and the recent barrier  
167 (segments  $\geq 6$ cM).

168 Next we consider a complementary time-varying scenario: an ancestral barrier disap-  
169 peared 20 generations ago to allow uniform migration (Figure 2c). Here the EEMS results  
170 again reflect the longer-term processes, and a barrier is evident. And again, by applying  
171 MAPS with different PSC segment lengths, we can see different migration surfaces cor-  
172 responding to different time scales, which are here reversed compared with the previous  
173 scenario: the historical barrier (for segments 2-6cM) and the recent uniform migration (seg-  
174 ments  $\geq 6$ cM).

## 175 Population Size Inference

176 As noted above, and discussed in (Petkova et al., 2016), EEMS estimates an “effective”  
177 migration surface that reflects the combined effects of population sizes  $\vec{N}$  and migration  
178 rates  $\mathbf{M}$ ; consequently it cannot distinguish between variation in  $\mathbf{M}$  and variation in  $\vec{N}$ . In  
179 contrast, MAPS has the potential to distinguish these two types of variation.

180 To illustrate this difference we simulate data with a constant migration surface, and a  
181 population size surface that has a 10-fold “dip” in the middle of the habitat (deme size 1,000  
182 vs 10,000; Figure 3). Petkova et al. (2016) performed a similar simulation, and showed that  
183 EEMS estimated an effective migration surface with an “effective barrier” in the middle,  
184 caused by the dip in population size. As expected, we obtain a similar result for EEMS here.  
185 Further, the EEMS inferred diversity surface is also approximately constant, because the  
186 diversity surface reflects changes in within-deme heterozygosity, and these vary little in this  
187 simulation. In contrast, MAPS is able to separate the influence of migration and population  
188 sizes: the estimated migration surface is approximately constant (with mean migration rate  
189 equal to the true value 0.01) and the estimated population size surface shows a dip in the  
190 middle, with accurate estimates of deme sizes (mean 985 at the center and 9100 at the  
191 edges). Additional simulations with non-uniform migration rates reinforce these results; see  
192 Supplementary Figure S3.



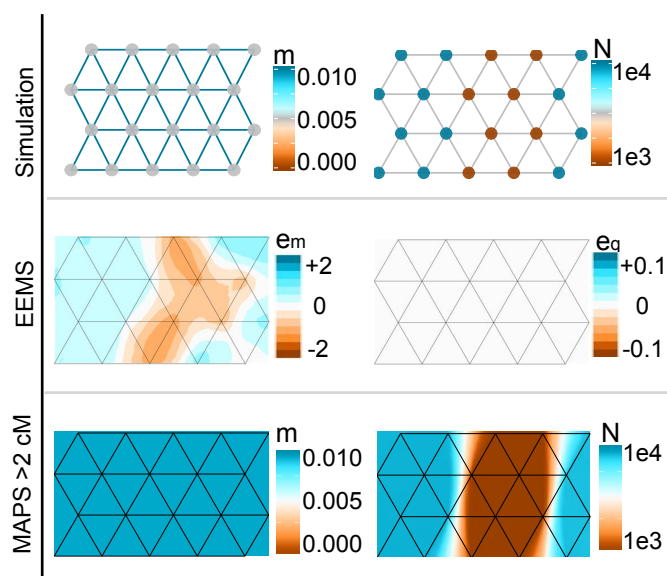

Figure 3: **Simulations comparing population sizes inferred with MAPS and “diversity-rates” inferred with EEMS.** We simulated uniform migration rates of 0.01 and a trough of low population sizes in the center of the habitat such that population sizes equal to 1,000 at the center and 10,000 otherwise. Under these simulations, EEMS infers a barrier in effective migration and infers uniform diversity rates. However, MAPS correctly infers a uniform migration surface (mean 0.01) and provides accurate estimates of deme sizes (mean 985 at the center and 9100 at the edges)

## 193 2.4 Applying MAPS to the POPRES data

194 To illustrate MAPS on real data, we analyze a genome-wide SNP dataset on individuals  
195 of European ancestry (the “POPRES” study [Nelson et al., 2008](#)). Previous analyses of  
196 these data have shown the strong influence of geography on patterns of genetic similarity  
197 ([Novembre et al., 2008](#); [Lao et al., 2008](#); [Ralph and Coop, 2013](#)). In particular [Ralph and  
198 Coop \(2013\)](#) analyzed spatial patterns in the sharing of PSC segments across Europe. To  
199 facilitate comparison with their results, we use their PSC segment calls, focusing on a subset  
200 of 2224 individuals after filtering (see Methods).

201 We applied MAPS to these data using three different PSC segment length bins: 1 – 5cM,  
202 5 – 10cM, and > 10cM. The longer bins correspond to more recent demography because as  
203 PSC lengths increase, the average coalescent times decrease. Indeed, the average coalescent  
204 times for each of these three length bins is inferred to be 90, 23 and 7.5 generations respec-  
205 tively (Supplementary Note), which correspond to 2700 years, 675 years and 225 years if we  
206 assume 30 years per generation.

207 We note that the accuracy of called PSC segments will vary across these bins: based on  
208 simulations in [Ralph and Coop \(2013\)](#) PSC segment calls in the smallest bin (1-5cM) will  
209 likely suffer from both false positives and false negatives, whereas for the longer bins PSC calls  
210 should be very reliable. Nonetheless, even in the smallest bin, closely-related individuals will  
211 still tend to show higher PSC sharing, and so the estimated MAPS surfaces should provide  
212 a useful qualitative summary of spatial patterns of variation even if quantitative estimates  
213 may be less reliable.

## 214 Inferring dispersal and population density surfaces

215 The inferred MAPS dispersal rates (migration rates scaled by grid step size) and population  
216 densities (population sizes scaled by grid area size) for each PSC length bin are shown in  
217 [Figure 4](#).

218 Largely speaking, the spatial variation in inferred dispersal rates and population densities  
219 is remarkably consistent across the different time scales ([Figure 4](#)). In the MAPS dispersal  
220 surfaces, several regions with consistently low estimated dispersal rates coincide with geo-  
221 graphic features that would be expected to reduce gene flow, including the English Channel,  
222 Adriatic Sea and the Alps. In addition we see consistently high dispersal across the region  
223 between the UK and Norway, which may reflect the known genetic effects of the Viking  
224 expansion (e.g [Leslie et al., 2015](#)). The MAPS population density surfaces consistently show  
225 lowest density in Ireland, Switzerland, Iberia, and the southwest region of the Balkans. This  
226 is consistent with samples within each of these areas having among the highest PSC seg-

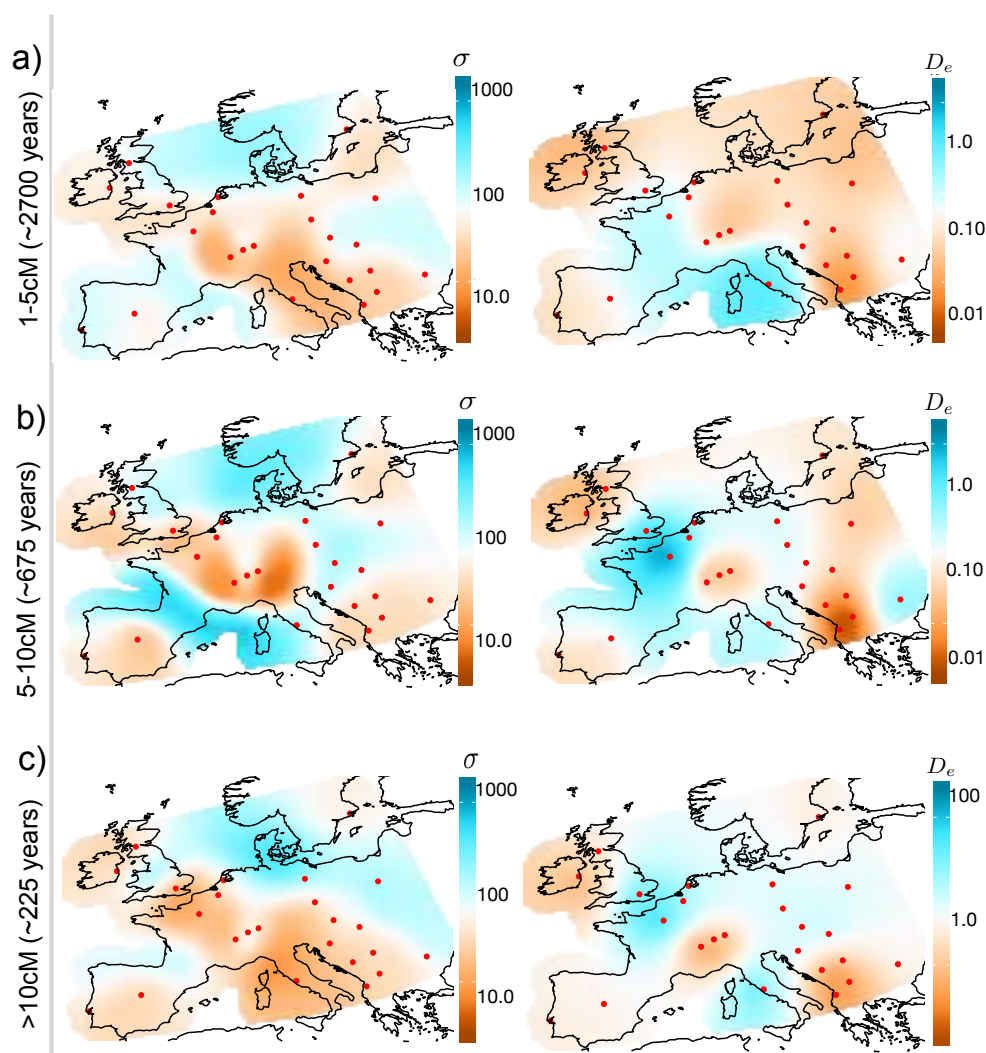

**Figure 4: Inferred Dispersal Surfaces and Population Density Surfaces over time for Europe.** We apply MAPS to a European subset of POPRES Nelson et al. (2008) with 2,234 individuals and plot the inferred dispersal  $\sigma(\vec{x})$  and population density  $D_e(\vec{x})$  surfaces for PSC length bins (a)  $> 1\text{cM}$  (b)  $5\text{-}10\text{cM}$  and (c)  $>10\text{cM}$ . We transform estimates of  $\vec{N}$  and  $\mathbf{M}$  to estimates of  $\sigma(\vec{x})$  and  $D_e(\vec{x})$  by scaling the migration rates and population sizes by the grid step-size and area (see Equations (17) and (18)). Generally, we observe the patterns of dispersal to be relatively constant over time periods, however, we see a sharp increase in population density in the most recent time scale ( $>10\text{cM}$ ). Note the wider plotting limits in inferred densities in the most recent time scale.

227 ment sharing (Supplementary Figure S4a). The MAPS inferred country population sizes are  
228 also highly correlated with estimated current census population sizes from [The World Bank](#)  
229 (2016) and [National Records of Scotland](#) (2011) (Supplementary Figure S6).

230 The most notable variation among the estimated surfaces from different time scales is a  
231 dramatic increase in the mean estimated population density in the most recent time scale  
232 (Figure 4 and Supplementary Figure S7). Indeed, the estimated mean for the last time  
233 scale – 1.4 individuals per square km – is 6-9 fold higher than those for the earlier time  
234 scales (0.16 and 0.22 respectively). This increase is consistent with the recent exponential  
235 growth of human population sizes ([Cohen, 1995](#)). The estimates themselves are lower than  
236 historical estimates of  $\approx$ 1-30 individuals per square km based on archaeological data (e.g.  
237 [Zimmermann et al., 2009](#)).

238 The dispersal surfaces show more minor changes between time periods (Figure 4 and  
239 Supplementary Figure S7). In particular, the estimated mean dispersal rates are relatively  
240 constant across time, being 73, 103 and 72 respectively (in units of km in a single genera-  
241 tion). These mean estimates are consistent with empirical estimates of 10-100 km in a single  
242 generation compiled by [Kaplanis et al. \(2018\)](#) using pedigrees of individuals living between  
243 1650 and 1950 AD. We do note the lower estimated dispersal rates between Portugal and  
244 Spain in the analyses of longer PSC segments (5-10 and  $>$  10cM), and the higher estimated  
245 dispersal rates through the Baltic Sea ( $>$  10cM segments), possibly reflecting changing gene  
246 flow in these regions in recent history.

## 247 **Comparison to [Ringbauer et al. \(2017\)](#)**

248 [Ringbauer et al. \(2017\)](#) also estimate a mean dispersal rate and population density from  
249 the Eastern European subset of the data analyzed here. Their estimates are based on  
250 PSC segments  $>$  4cM, which is most comparable with our analysis of 5-10cM. Unlike our  
251 analysis, their estimates are based on a spatially homogeneous model. To compare with their  
252 estimates we computed the mean of the estimated dispersal rate and population densities  
253 in Eastern Europe (but based on an analysis of the full data). For the dispersal rate this  
254 yields an estimate of 88 km in a single generation, which is consistent with the range of  
255 50-100 given by ([Ringbauer et al., 2017](#)). For the population density, it yields an estimate  
256 of 0.10 individuals per square km, which is somewhat higher than the estimate of 0.05  
257 obtained under a comparable (time-homogeneous) population model in ([Ringbauer et al.,](#)  
258 [2017](#)). Possibly our higher estimate partly reflects the influence of our spatial modeling  
259 approach, which will tend to shift the estimate for Eastern Europe toward the estimated  
260 mean across all of Europe (which is 0.22). In addition, the difference in length thresholds  
261 ( $>$  4cM versus 5-10cM) may also be contributing; if segments in the [Ringbauer et al. \(2017\)](#)

262 analysis are on average shorter and hence older, one would expect lower density estimates,  
263 based on our results that suggest lower densities in the past (Figure 4).

## 264 Comparison with EEMS

265 The EEMS results for these data (Figure S8) show non-trivial differences with the MAPS  
266 results (Figure 4a). Two potential causes are: i) differences in the summary data used (PSC  
267 segment sharing vs genetic distances) and hence sensitivity to different timescales; and ii)  
268 differences in the underlying models (e.g. composite Poisson likelihood vs Wishart likelihood,  
269 and different parameterizations/approximations to the coalescent model; see Discussion). To  
270 evaluate the impact of i) we compared the PSC segment sharing and genetic distances, and  
271 found their correlation to be only modest (Pearson's  $\rho = -0.38$ ), with the most notable devi-  
272 ation for comparisons between countries in Eastern Europe (Figure S9a). Furthermore, most  
273 of this correlation is due to geographic distance: after controlling for geographic distance the  
274 correlation is only -0.18, which may be a more relevant metric because inferred spatial het-  
275 erogeneity in gene flow (barriers and corridors) is driven by departures from simple isolation  
276 by distance.

277 To better assess the impact of ii) we applied EEMS on a distance matrix constructed  
278 to have the same similarity patterns as the PSC segment sharing matrix input to MAPS  
279 (1–5cM length bin). The resulting EEMS surface is more similar to the corresponding MAPS  
280 dispersal surface (Supplementary Figure S9b vs Figure 4a), but there remain substantial  
281 differences. This investigation confirms what we expected *a priori* — the two surfaces should  
282 be different because the underlying models and inferred parameters of MAPS and EEMS  
283 are different. As noted before, EEMS infers the “effective migration rate” which reflects the  
284 effects of both the migration rates and population sizes, while MAPS infers them separately.

## 285 3 Discussion

286 We developed a method (MAPS) for inferring migration rates and population sizes across  
287 space and time periods from geo-referenced samples. Our method builds upon a previous  
288 method developed for estimating effective migration surfaces (EEMS) (Petkova et al., 2016).  
289 However there are several differences between MAPS and EEMS. Most fundamentally, MAPS  
290 draws inferences from observed levels of PSC sharing between samples, whereas EEMS draws  
291 inferences from the genetic distance. These two data summaries capture different information  
292 about the coalescent distributions: in essence, PSC sharing captures the frequency of recent  
293 coalescent events, whereas genetic distance captures the mean coalescent time. Consequently  
294 MAPS inferences largely reflect the recent past ( $\lesssim$  1000 years for human recombination

295 rates and generation times with PSC segments  $> 2cM$ ), whereas EEMS inferences reflect  
296 demographic history on a longer timescale across which pairwise coalescence occurs (99% of  
297 events  $> 6000$  years old, assuming diploid  $N_e$  of 10,000 for humans, exponential coalescent  
298 time distribution).

299 Another consequence of modelling PSC sharing, rather than genetic distance, is that  
300 MAPS can separately estimate demographic parameters related to migration rates ( $\mathbf{M}$ ) and  
301 population sizes ( $\vec{N}$ ), as in Figure 3 for example. In essence MAPS does this by using the  
302 known recombination map as an additional piece of information to help calibrate inferences.  
303 In contrast EEMS, which makes no use of recombination maps, cannot separate  $\mathbf{M}$  and  $\vec{N}$ .  
304 Instead EEMS infers a compound parameter referred to as the “effective migration rate”,  
305 which is influenced by changes in both  $\mathbf{M}$  and  $\vec{N}$ ; see Figure 3. In principle, if applied  
306 to sequence data instead of genotype data at ascertained SNPs, the genetic distances used  
307 by EEMS could perhaps also separately estimate  $\mathbf{M}$  and  $\vec{N}$  by exploiting known mutation  
308 rates to calibrate inferences. However, this would require non-trivial additional changes  
309 to the current EEMS likelihood, which was designed to be applicable to ascertained SNPs  
310 and does not explicitly model variation in population sizes. (The EEMS likelihood instead  
311 uses a “diversity rate”  $e_q$ , which reflects within-deme heterozygosity but is not explicitly a  
312 population size parameter.)

313 An additional useful feature of PSC segments is that, by varying the lengths analyzed,  
314 one can infer parameter values across different time scales. For example, our simulations  
315 show how by contrasting shorter and longer PSC segments, the method can reveal different  
316 gene flow patterns in scenarios with recent changes (see Figures 2 and 3). Further support  
317 comes from our empirical analysis of the POPRES data-set, where we found population sizes  
318 inferred from longer PSC segments to be more correlated with census sizes [The World Bank](#)  
319 (2015 census [2016](#)) and [National Records of Scotland](#) (2011, 2011 census) than sizes inferred  
320 from shorter segments (e.g. Spearman’s  $\rho = 0.71$  for  $1 - 5cM$  and  $\rho = 0.84$  for  $> 10cM$ ; see  
321 Supplementary Figures S5 and S6). Also, not surprisingly, PSC segments greatly outperform  
322 using heterozygosity as an indicator of census population size (the Spearman’s correlation  
323 coefficient between heterozygosity and census size was insignificant, p-value = 0.25).

324 Our estimates of dispersal distances and population density from the POPRES data are  
325 among the first such estimates using a spatial model for Europe (though see ([Ringbauer](#)  
326 [et al., 2017](#))). The features observed in the dispersal and population density surfaces are in  
327 principle discernible by careful inspection of the numbers of shared PSC segments between  
328 pairs of countries (e.g. using average pairwise numbers of shared segments, Supplementary  
329 Figure S4b, as in [Ralph and Coop \(2013\)](#)). For example, high connectivity across the North  
330 Sea is reflected in the raw PSC calls: samples from the British Isles share a relatively high

331 number of PSC segments with those from Sweden (Supplementary Figure S4b). Also the low  
332 estimated dispersal between Switzerland and Italy is consistent with Swiss samples sharing  
333 relatively few PSC segments with Italians given their close proximity (Supplementary Figure  
334 S4b). However, identifying interesting patterns directly from the PSC segment sharing data  
335 is not straightforward, and one goal of MAPS (and EEMS) is to produce visualizations that  
336 point to patterns in the data that suggest deviations from simple isolation by distance.

337 Our results suggest that several features of dispersal in Europe have been relatively stable  
338 over the last  $\sim 3000$  years, whereas the population sizes have been increasing. The relative  
339 stability of the gene flow patterns is perhaps surprising given ancient DNA results suggest  
340 a continually dynamic history of population movements. One possibility is that much of  
341 European population structure may have been established by the end of the Bronze Age  
342 (4,000 years ago), with relatively more stable patterns in the intervening period that is  
343 reflected in IPSC segments. Nonetheless, the dispersal is not completely stable—our results  
344 suggest changes in Iberia, the Baltic, and to minor degrees in other areas.

345 The inferred population size surfaces for the POPRES data show a general increase in  
346 sizes through time, with small fluctuations across geography; for instance, Polish samples  
347 have a relatively larger population size in inferred values from the largest length scale ( $>$   
348 10cM). In our results, the smallest inferred population sizes are in the Balkans and Eastern  
349 Europe more generally. This is in agreement with the signal seen by [Ralph and Coop \(2013\)](#);  
350 however, taken at face value, our results suggest that high PSC sharing in these regions may  
351 be due more to consistently low population densities than to historical expansions (such as  
352 the Slavic or Hunnic expansions).

353 Although consistent with previous results, our estimates of dispersal and population sizes  
354 do not exactly agree with empirical estimates. For example, our estimates of population  
355 sizes are consistently lower than the census sizes (Supplementary Figure S6). This is to be  
356 expected for several reasons. First, census sizes include non-breeding individuals (juvenile  
357 and post-reproductive age) that do not impact the formation of PSC segments. Second,  
358 MAPS is fitting a single population size per location, and in a growing population the best  
359 fit population size will be an under-estimate of contemporary size. Third, in a wide class  
360 of population genetic models, the effective size, even among reproductive age individuals, is  
361 lower than the census size because of factors that inflate the variance in offspring number.  
362 Fourth, some discrepancy is expected simply because the stepping-stone population genetic  
363 model used here is only a coarse approximation to the complex spatial dynamics of human  
364 populations. Finally, recombination rate mis-specification can bias the inferred parameters.  
365 Furthermore, we caution that our results must be interpreted in the light of the fact that we  
366 have limited spatial sampling across Europe, and only very coarse geographical origin data

367 (country of origin).

368 Here, as in [Petkova et al. \(2016\)](#) we use a discrete stepping-stone model to approximate  
369 a process that might be more naturally modelled as continuously varying in space. Recent  
370 work ([Ringbauer et al., 2017](#); [Baharian et al., 2016](#)) exploits continuous models to estimate  
371 dispersal and population density parameters from sharing of LPSC segments. However, these  
372 methods assume that dispersal and population density are constant across space: extending  
373 them to allow these parameters to vary across space could be an interesting avenue for future  
374 work.

375 A major achievement in method development in population genetics would be to jointly  
376 infer migration rates and population sizes across both space and time. MAPS is a step  
377 towards this goal. However, we do not infer demography explicitly as a function of time and  
378 instead infer surfaces in time blocks defined by PSC length bins. In principle, our method  
379 allows for inference of demography across time by treating PSC segments as independent  
380 across length bins, see Equation (S27) in Supplementary Methods. However, this requires  
381 fitting multiple migration/population surfaces and is computationally unfeasible with our  
382 current MCMC routine. Other computational techniques (e.g. Variational Bayes or fast  
383 optimization of the likelihood) might make this goal possible.

## 384 4 Methods

### 385 4.1 MAPS configuration

386 For the empirical data analysis, we ran MAPS with 200 demes. The MAPS output was  
387 obtained by averaging over 20 independent replicates (the number of MCMC iterations in  
388 each replicate was to set 5e6, number of burn-in iterations set to 2e6, and we thinned every  
389 2000 iterations). We provide the the MAPS here: <https://github.com/halasadi/MAPS>,  
390 and the plotting scripts here: <https://github.com/halasadi/plotmaps>.

### 391 4.2 Inferring PSC segments from the data

392 Our pipeline to call PSC segments for simulations can be found here: [https://github.com/halasadi/ibd\\_data\\_pipeline](https://github.com/halasadi/ibd_data_pipeline). We follow the recommendations of [Browning and Browning \(2011, 2013\)](#) and [Ralph and Coop \(2013\)](#) by running BEAGLE multiple times and merging  
394 shorter segments.  
395

396 For the empirical data analysis, we use the PSC segments (“IBD”) calls from [Ralph and  
397 Coop \(2013\)](#), which can be found here: <https://github.com/petrelharp/euroibd>. We



398 further applied a filter to retain countries with at least 5 sampled individuals, and removed  
399 Russian and Greek individuals to restrict the habitat to a smaller spatial scale

### 400 4.3 Model

401 MAPS assumes a population genetic model consisting of triangular grid of  $d$  demes (or  
402 populations) with symmetric migration. The density of the grid is pre-specified by the  
403 user with the consideration that the computational complexity is  $O(d^3)$ . We use Bayesian  
404 inference to estimate the MAPS parameters: the migration rates and coalescent rates  $M$   
405 and  $q$  respectively. Its key components are the likelihood, which measures how well the  
406 parameters explain the observed data, and the prior, which captures the expectation that  
407  $M$  and  $q$  have some spatial structure (in particular, the idea that nearby edges will tend to  
408 have similar migration rates and nearby demes have similar coalescent rates).

409 MAPS estimate the posterior distribution of  $\Theta = M, q$  given the data. The data used  
410 for MAPS consists of a similarity matrix  $X^R = \{X_{i,j}^R\}$  which denotes the number of PSC  
411 segments in a range  $R = [u, v]$  base-pairs shared between pairs of haploid individuals  $(i, j) \in$   
412  $\{1, \dots, n\} \times \{1, \dots, n\}$  where  $n$  is the number of (haploid) individuals. Furthermore, a  
413 recombination rate map is required as input for MAPS. The likelihood is a function of the  
414 expected value of  $X_{i,j}^R$  ( $E[X_{i,j}^R]$ ). Below we describe the computation of  $E[X_{i,j}^R]$  and the other  
415 key components of the likelihood. Finally, we briefly describe the prior used and an MCMC  
416 scheme to sample from the posterior distribution of  $\Theta$ .

#### 417 The likelihood function

Let  $\alpha, \beta$  denote the demes that (haploid) individuals  $i$  and  $j$  are sampled in, we define,

$$\lambda_{\alpha,\beta}^{\Theta} = E[X_{i,j}^R | \Theta]. \quad (1)$$

418 For the marginal distribution, we assume

$$X_{i,j}^R | \Theta \sim \text{Pois}(\lambda_{\alpha,\beta}^{\Theta} | \Theta), \quad (2)$$

419 and one option for computing the joint distribution of the data is to assume independence  
420 between pairs of individuals  $(i, j)$  as done previously (Palamara et al., 2012; Palamara and  
421 Peer, 2013; Ralph and Coop, 2013; Ringbauer et al., 2017). This assumption leads to the  
422 log-likelihood,

$$\log \mathcal{L}(\Theta; \bar{X}) = \sum_{\alpha \leq \beta} n_{\alpha, \beta} \left( \bar{X}_{\alpha, \beta} \log(\lambda_{\alpha, \beta}^{\Theta}) - \lambda_{\alpha, \beta}^{\Theta} \right), \quad (3)$$

where  $\bar{X} = \{\bar{X}_{\alpha, \beta}\}$  such that  $(\alpha, \beta) \in \{1, \dots, d\} \times \{1, \dots, d\}$  and  $d$  is the number of demes. Furthermore

$$\bar{X}_{\alpha, \beta} = \begin{cases} \frac{1}{n_{\alpha} n_{\beta}} \sum_{i \in d_{\alpha}, j \in d_{\beta}} X_{ij}^R & \text{if } \alpha \neq \beta \\ \frac{1}{\binom{n_{\alpha}}{2}} \sum_{i \in d_{\alpha}, i < j} X_{ij}^R & \text{if } \alpha = \beta \end{cases}, \quad (4)$$

where  $n_{\alpha}$  is the number of sampled individuals in deme  $\alpha$ ,  $d_{\alpha}$  is the set of all individuals in deme  $\alpha$ , and

$$n_{\alpha, \beta} = \begin{cases} n_{\alpha} n_{\beta} & \text{if } \alpha \neq \beta \\ \binom{n_{\alpha}}{2} & \text{if } \alpha = \beta \end{cases}. \quad (5)$$

423 However, we found that there were significant correlations in IPSC segments between  
424 individuals. To deal with this, we down-weighted the likelihood function to reflect the  
425 “effective” number of samples ( $e_{\alpha, \beta}$ ) instead of the number of pairs ( $n_{\alpha, \beta}$ ). The effective  
426 number of samples between demes  $\alpha, \beta$  is given by,

$$e_{\alpha, \beta} = \frac{\bar{X}_{\alpha, \beta}}{\text{Var}[\bar{X}_{\alpha, \beta}]}. \quad (6)$$

427 In the case of independence,  $\text{Var}[\bar{X}_{\alpha, \beta}] \approx \frac{\bar{X}_{\alpha, \beta}}{n_{\alpha, \beta}}$ . However, because of correlations in the data,  
428 the actual variance is significantly larger than the variance computed under an independence  
429 model. Here, we estimate  $\text{Var}[\bar{X}_{\alpha, \beta}]$  by bootstrapping individuals with replacement. This  
430 way, we model the correlations between pairs of individuals for within and between-deme  
431 comparisons. The loglikelihood adjusted for correlations is given by,

$$\log \mathcal{L}(\Theta; \bar{X}) = \sum_{\alpha \leq \beta} e_{\alpha, \beta} \left( \bar{X}_{\alpha, \beta} \log(\lambda_{\alpha, \beta}^{\Theta}) - \lambda_{\alpha, \beta}^{\Theta} \right). \quad (7)$$

### 432 Computing the expectation of $X_{i,j}^R | \Theta$

Next, we derive expressions to compute the expectation of the number of PSC segments of length greater than  $u$  ( $X_{i,j}^{R=[\mu, \infty)}$ ) conditional on the demography  $\Theta$ . From results in [Palamara et al. \(2012\)](#) it is easy to show that

$$E[X_{i,j}^{R=[\mu, \infty)} | \Theta] \approx G \int_u^{\infty} f_L(l | \Theta) / l \, dl, \quad (8)$$

433 where  $G$  denotes the length of the genome (in base-pairs),  $L$  denotes the random length (in  
 434 base-pairs) of the PSC segment between  $i$  and  $j$  containing a pre-specified position in the  
 435 genome (base  $b$  say), and  $f_L$  is its probability density. Intuitively,  $Gf_L(l|\Theta)$  is the expected  
 436 number of base-pairs that lie in PSC segments of length  $l$ , making  $\frac{Gf_L(l|\Theta)}{l}$  the expected  
 437 number of PSC segments of length  $l$ . Integrating the latter quantity from  $\mu$  to  $\infty$  gives the  
 438 desired result.

To help compute (8) we introduce  $T_{ij}$  to denote the (random) coalescent time in gen-  
 erations between  $i$  and  $j$  at base  $b$ , with density  $f_{T_{i,j}}(t|\Theta)$ . Then (8) can be written as an  
 integral over  $T_{ij}$ :

$$E[X_{i,j}^{R=[\mu,\infty)}|\Theta] \approx G \int_{\mu}^{\infty} f_L(l|\Theta)/l dl \quad (9)$$

$$= G \int_{\mu}^{\infty} \int_0^{\infty} f_{L,T_{i,j}}(l, t|\Theta)/l dt dl \quad (10)$$

$$= G \int_0^{\infty} f_{T_{i,j}}(t|\Theta) \int_{\mu}^{\infty} f_L(l|t)/l dl dt, \quad (11)$$

439 using the relation that  $f_{L,T_{i,j}}(l, t|\Theta) = f_L(l|t, \Theta)f_{T_{i,j}}(t|\Theta) = f_L(l|t)f_{T_{i,j}}(t|\Theta)$ . A key simplifi-  
 440 cation here comes from the fact that, given  $T_{ij}$ ,  $L$  is conditionally independent of  $\Theta$ .

It can be shown that the conditional distribution of  $L$  given  $T_{ij}$  is an erlang-2 distribution  
 (Palamara et al., 2012; Palamara and Peer, 2013; Hein et al., 2004) with density

$$f_L(l|t) = 4r^2t^2le^{-2trl}, \quad (12)$$

where  $r$  is the recombination rate per base-pair. Substituting this into the inner integral of  
 (11) and integrating analytically yields

$$\int_{\mu}^{\infty} f_L(l|t)/l dt = 2rte^{-2tru}, \quad (13)$$

leading to

$$E[X_{i,j}^{R=[\mu,\infty)}|\Theta] \approx G \int_0^{\infty} f_{T_{i,j}}(t|\Theta)2rte^{-2tru} dt. \quad (14)$$

Here, we assume the probability density of  $T_{i,j}$  is given by,

$$f_{T_{i,j}}(t|\Theta) \approx \sum_{\kappa} q_{\kappa}(e^{-Mt})_{\alpha,\kappa}(e^{-Mt})_{\beta,\kappa}, \quad (15)$$

441 where demes  $\alpha, \beta$  denote the deme where lineages  $i$  and  $j$  are sampled from,  $q_{\kappa} = \frac{1}{2N_{\kappa}}$  is  
 442 the coalescent rate in deme  $\kappa$ , and  $M = \langle m_{\alpha,\beta} \rangle$  is the migration rate matrix between all  $d$

443 demes such that  $(\alpha, \beta) \in \{1, \dots, d\} \times \{1, \dots, d\}$ . We compute the matrix exponential by first  
444 diagonalizing the matrix  $M = PDP^T$  and compute  $e^{-Mt} = Pe^{-Dt}P^T$ .

445 Having computed all individual components of  $\int_0^\infty f_{T_{i,j}}(t|\Theta)2rte^{-2tru}dt$ , we are left to  
446 evaluate a one-dimensional integral which we do by Gaussian quadrature (with 50 weights).

To compute the expected number of PSC segments in a range  $R = (\mu, \nu)$

$$E[X_{i,j}^{R=[\mu,\nu]}] = E[X_{i,j}^{R=[\mu,\infty)}] - E[X_{i,j}^{R=[\nu,\infty)}]. \quad (16)$$

447 As mentioned previously, the units of  $\mu, \nu$  are in base-pairs. However, we can transform to  
448 units of centiMorgans (cM) by :  $\mu_{cM} = 100\mu r$ .

## 449 The Prior

450 MAPS uses a hierarchical prior parameterized by Voronoi tessellation (similar to EEMS).  
451 The Voronoi tessellation partitions the habitat into  $C$  cells. Given a Voronoi tessellation of  
452 the habitat, each cell  $c \in \{1, \dots, C\}$  is associated with a migration rate ( $\mathcal{M}_c$ ) and population  
453 size ( $\mathcal{N}_c$ ). Demes ( $\alpha$ ) that fall into cell  $c$  will have population size  $N_\alpha = \mathcal{N}_c$ , and similarly,  
454 migration rates between demes  $\alpha, \beta$  equal  $m_{\alpha,\beta} = \frac{\mathcal{M}_{c_1} + \mathcal{M}_{c_2}}{2}$  if demes  $\alpha, \beta$  fall into cells  $c_1$   
455 and  $c_2$ . We use an MCMC to integrate over the distribution on partitions of Voronoi cells.  
456 See Supplementary Notes section 5.4 for more information.

## 457 The MCMC

458 We break up the MCMC updates into updating a series of conditionally independent dis-  
459 tributions. Provided the conditional posterior distributions for each part give support to  
460 all the parameter space, this will define an irreducible Markov chain with the correct joint  
461 posterior distribution [Stephens \(2000\)](#). We use Metropolis-Hastings to update all parame-  
462 ters, and random-walk proposals for most updates, with exception of birth-death updates  
463 for updating the number of Voronoi cells. See Supplementary Notes section 5.5 for more  
464 information.

## 465 Transformation of parameters to continuous space

Given an inferred population size at a particular deme  $\alpha$  and a grid with uniform spacing,  
the transformation from population size to population density is given by

$$D_e(x) = \frac{N_\alpha}{\Delta A}, \quad (17)$$

466 where  $\Delta A = \frac{A_H}{d}$  is the area covered per deme such that  $A_H$  is the area of the habitat  
467 (in  $\text{km}^2$ ),  $d$  is the number of demes, and  $x$  corresponds to the spatial position of deme  $\alpha$ .  
468 Intuitively, (17) implies that the density multiplied by the area equals population size, i.e.  
469  $D_e(x)\Delta A \approx N_\alpha$ . Equation (17) can be analogous to equation 7 in (Baharian et al., 2016).

470 Given a migration rate ( $m$ ), the transformation to dispersal distances is given by,

$$\sigma = \sqrt{m}\Delta x, \quad (18)$$

471 where  $\Delta x$  is the step size of the grid (km). The dispersal distance represents the distance  
472 traveled by an individual after one generation, and sometimes is called the “root mean square  
473 distance” or “dispersal rate” (Barton et al., 2002). Please see Supplementary Note section  
474 5.2 for the derivation of (18).

## 475 Funding

476 This work was supported by National Institute of Health funding [U01CA198933 to H.A.,  
477 M.S., and J.N], [HG002585 to M.S.]; and the National Science Foundation Graduate Research  
478 Fellowship to H.A.

## 479 Acknowledgements

480 We thank Dick Hudson for helpful discussion on the identifiability of demographic parameters  
481 in coalescent models; Evan Koch, Ben Peter and the Novembre & Stephens Lab for comments  
482 on the paper and helpful discussion. We further thank Peter Carbonetto for computational  
483 support and helpful discussion.

## 484 5 Supplementary Note

## 485 5.1 The model

486 The coalescent process for two samples under a multi-deme model can be described by a  
 487 continuous time Markov chain (CTMC) (Bahlo and Griffiths, 2001). Let  $i, j$  represent sam-  
 488 pled lineages and  $\alpha, \beta$  their locations, respectively,  $d$  is the number of demes (or populations)  
 489 and  $(\alpha, \beta) \in \{1, \dots, d\} \times \{1, \dots, d\}$ . Let  $c$  denote the coalescent state. The infinitesimal rate  
 490 matrix  $R$  of this CTMC is

$$\begin{aligned}
 R_{(\alpha,\beta),(\gamma,\beta)} &= m_{\alpha,\gamma} \quad \beta = 1, \dots, d, \gamma \neq \alpha \\
 R_{(\alpha,\beta),(\alpha,\gamma)} &= m_{\beta,\gamma} \quad \alpha = 1, \dots, d, \gamma \neq \beta \\
 R_{(\alpha,\alpha),(c)} &= q_\alpha \\
 R_{(\alpha,\beta),(\alpha,\beta)} &= -(m_{\alpha+} + m_{\beta+}) - \delta_{\alpha\beta}q_\alpha \\
 R_{(c),(c)} &= 0 \\
 R_{(\alpha,\beta),(\gamma,\kappa)} &= 0 \quad \gamma, \kappa = 1, \dots, d, \gamma \neq \alpha, \kappa \neq \beta,
 \end{aligned} \tag{S19}$$

491 where  $M = \langle m_{\alpha,\beta} \rangle$  denotes the migration rate matrix, and  $m_{\alpha,\beta}$  is the migration rate between  
 492 demes  $\alpha, \beta$  and  $q_\alpha = \frac{1}{2N_\alpha}$  is the coalescent rate of deme  $\alpha$  which is proportional to the inverse  
 493 of the population size at deme  $\alpha$  ( $N_k$ ). Let  $T_{i,j}$  denote the (random) coalescent time between  
 494 the pair of sampled lineages, and  $f_{T_{i,j}}(t)$  denote the probability density of a coalescent event  
 495 at time  $t$ . Here, we derive  $f_{T_{i,j}}(t)$  by conditioning on the position of the two lineages.

496 **Lemma 5.1** *Let  $(X_i(t), X_j(t)) \in \{1, \dots, d\} \times \{1, \dots, d\}$  denote the position of lineage  $i$  and*  
 497 *lineage  $j$  at time  $t$  respectively. The probability density  $f_{T_{i,j}}(t)$  that lineage  $i$  and  $j$  coalesce*  
 498 *at time  $t$  is given by  $\sum_{\kappa=1}^d q_\kappa P(X_i(t) = \kappa, X_j(t) = \kappa)$ .*

499 For  $\Delta t \approx 0$ ,

$$P(T_{i,j} \in [t, t + \Delta t]) \tag{S20}$$

$$\approx \sum_{\kappa=1}^d P(T_{i,j} \in [t, t + \Delta t] | X_i(t) = \kappa, X_j(t) = \kappa) P(X_i(t) = \kappa, X_j(t) = \kappa) \tag{S21}$$

$$\approx \sum_{\kappa=1}^d q_\kappa \Delta t P(X_i(t) = \kappa, X_j(t) = \kappa). \tag{S22}$$

500 Taking the limit  $\Delta t \rightarrow 0$ , we arrive at the density

$$f_{T_{i,j}}(t) = \lim_{\Delta t \rightarrow 0} P(T_{i,j} \in [t, t + \Delta t]) / \Delta t = \sum_{\kappa=1}^d q_{\kappa} P(X_i(t) = \kappa, X_j(t) = \kappa). \quad (\text{S23})$$

## 501 The random walk approximation to the coalescent

502 Here, we introduce an approximation,

$$P(X_i(t) = \kappa, X_j(t) = \kappa) \approx P(X_i(t) = \kappa)P(X_j(t) = \kappa). \quad (\text{S24})$$

503 The intuition is that probability that lineage  $i$  and  $j$  coalesce before time  $t$  is extremely small  
 504 such that the two lineages approximately behave like two independently moving particles.  
 505 Each lineage can be modeled by a random walk with transition matrix  $M$ . These assump-  
 506 tions were also made in the context of continuous spatial diffusion models for haplotype  
 507 sharing Baharian et al. (2016); Ringbauer et al. (2017), and even further back, as a general  
 508 approximation to the two-dimensional continuous-space coalescent process (Barton et al.,  
 509 2002; Wilkins, 2004; Blum et al., 2004; Novembre and Slatkin, 2009; Robledo-Arnuncio and  
 510 Rousset, 2010).

511 This approximation implies that

$$f_{T_{i,j}}(t) \approx \sum_{\kappa} q_{\kappa} (e^{-Mt})_{\alpha,\kappa} (e^{-Mt})_{\beta,\kappa}, \quad (\text{S25})$$

512 where lineages  $i, j$  are initially sampled in deme  $\alpha, \beta$ . Or equivalently in matrix form,

$$f_{T_{i,j}}(t) \approx \left( e^{-Mt} Q e^{-Mt} \right)_{i,j}, \quad (\text{S26})$$

513 where  $Q = \text{diag}(q_1, \dots, q_d)$ .

## 514 Varying migration rates and population sizes across time

**Corollary 5.1.1** *Let time slice  $k$  be defined by the interval  $t_{k-1} < t < t_k$ ,  $M_k$  denote the migration rate matrix in time slice  $k$ , and  $Q_k = \text{diag}(q_1^k, \dots, q_d^k)$  where  $q_{\alpha}^k$  denotes the coalescent rate in deme  $\alpha$  at time slice  $k$ . Let  $T_{i,j}$  denote the coalescent time between lineage  $i, j$  sampled in demes  $\alpha, \beta$ , then under the independence assumption, for  $t \in (t_{K-1}, t_K)$ ,*

$$f_{T_{i,j}}(t) \approx \left( G_K(t) Q_K G_K(t) \right)_{\alpha,\beta}, \quad (\text{S27})$$



515 where  $G_K(t) = \exp\left(-\sum_{k=1}^{K-1}(t_k - t_{k-1})M_k - (t - t_K)M_K\right)$ .

## 516 Expected number of IPSC segments given the demography $\Theta$

517 **Lemma 5.2** Let  $X_{i,j}^\mu$  denote the number of PSC segment greater than  $\mu$  basepairs shared  
 518 between haploid individuals  $i, j$ ,  $\Theta$  denote the demographic model,  $G$  the size of the genome,  
 519  $L$  denotes the random length (in base-pairs) of the PSC segment between  $i$  and  $j$  containing  
 520 a pre-specified position in the genome, then  $E[X_{i,j}^\mu|\theta] \approx G \int_u^\infty f_L(l|\Theta)/l dl$ .

521 Let  $E[\mathcal{F}^\mu|\Theta]$  denote the expected fraction of the genome between  $i, j$  that lies in PSC seg-  
 522 ments greater than  $\mu$ , and  $E[s^\mu|\Theta]$  the expected size of a PSC segment conditional on it  
 523 being at least length  $\mu$ . According to equations 9-14 from (Palamara et al., 2012),

$$E[X_{i,j}^\mu|\theta] \approx \frac{G E[\mathcal{F}^\mu|\theta]}{E[s^\mu|\Theta]}, \quad (\text{S28})$$

$$E[\mathcal{F}^\mu|\Theta] = \int_\mu^\infty f_L(l|\Theta)dl, \quad (\text{S29})$$

$$E[s^\mu|\Theta] = \frac{\int_\mu^\infty f_L(l|\Theta)dl}{\int_\mu^\infty f_L(l|\Theta)/l dl}. \quad (\text{S30})$$

524 We obtain the desired result by substituting (S29) and (S30) into (S28) and canceling like-  
 525 terms.

## 526 Expected age of a segment

527 We choose PSC segment lengths based on their expected age which is derived below.

528 **Lemma 5.3** The expected coalescent time ( $t$ , in generations) of an PSC segment between  
 529 between length  $L_1$  centiMorgans and  $L_2$  centiMorgans is approximately  $\frac{300}{4}(\frac{1}{L_1} + \frac{1}{L_2})$  if the  
 530 effective population size ( $N$ ) is sufficiently large.

531 We choose to work in units of basepairs, and will convert back to units of morgans at the  
 532 end. We convert  $L_1$  into units of base-pairs with the transformation:  $\mu = \frac{L_1}{100r}$  and similarly  
 533  $\nu = \frac{L_2}{100r}$ .

Let us denote  $T|l, N$  as the random coalescent time of a PSC segment that is at least length  $l$  under a single-deme demography model with population size  $N$ . The expected

coalescent time of an PSC segment longer than  $\mu$  base-pairs can be expressed as

$$E[T|l \geq \mu, N] = \int_0^\infty t f_T(t|l \geq \mu, N) dt = \int_0^\infty t \frac{f_L(l \geq \mu|t) f_T(t|N)}{f_L(l \geq \mu|N)} dt \quad (\text{S31})$$

$$= \frac{\int_0^\infty t f_L(l \geq \mu|t) f_T(t|N) dt}{\int_0^\infty f_L(l \geq \mu|t) f_T(t|N) dt},$$

534 where  $f_L(l|t) = 4r^2 t^2 l e^{-2trl}$  denotes the probability density that a PSC segment is of length  
 535  $l$  given it has a common ancestor event at time  $t$ ,  $f_T(t|N)$  denotes the probability density  
 536 that a coalescent event occurs at time  $t$  under the demography model with population size  
 537  $N$ .

Next, we expand a key term in equation (S31)

$$f_L(l \geq \mu|t) = \int_\mu^\infty f_L(l|t) dl = (2rt\mu + 1) \exp\left(-2rt\mu + 1\right) \quad (\text{S32})$$

and assume,

$$f_T(t|N) = \frac{e^{-t/N}}{N}. \quad (\text{S33})$$

538 Putting everything together,

$$E[T|l \geq \mu, N] = \frac{N(1 + 6Nr\mu)/(1 + 2Nr\mu)^3}{(1 + 4Nr\mu)/(1 + 2Nr\mu)^2} = \frac{N(1 + 6Nr\mu)}{1 + 6Nr\mu + 8N^2(r\mu)^2}. \quad (\text{S34})$$

539 We can remove the dependence of  $N$  by taking  $\lim_{N \rightarrow \infty}$  as done similarly in Baharian et al.  
 540 (2016),

$$\lim_{N \rightarrow \infty} E[T|l \geq \mu, N] = \frac{3}{4r\mu} \quad (\text{S35})$$

Now that we have derived the expected age of PSC segment longer than  $\mu$ , it is quite simple to expand the equation for PSC segments between  $\mu$  and  $\nu$  base-pairs,

$$E[T|\mu \leq l \leq \nu] = \frac{\int_0^\infty t f_L(\mu \leq l \leq \nu|t) f_{T|N}(t) dt}{\int_0^\infty f_L(\mu \leq l \leq \nu|t) f_{T|N}(t) dt} = \frac{\int_0^\infty t \left( f_L(l \geq \nu|t) - f_L(l \geq \mu|t) \right) f_{T|N}(t) dt}{\int_0^\infty \left( f_L(l \geq \nu|t) - f_L(l \geq \mu|t) \right) f_{T|N}(t) dt}$$

$$= \frac{3}{4} \left( \frac{1}{r\mu} + \frac{1}{r\nu} \right) \quad (\text{S36})$$

541 We transform back to units of centimorgans: let  $L_1 = 100r\mu$  and  $L_2 = 100r\nu$  be in units of  
 542 centimorgans, and taking the limit, we get the desired result

$$\lim_{N \rightarrow \infty} E[t | \mu \leq l \leq \nu] = \frac{300}{4} \left( \frac{1}{L_1} + \frac{1}{L_2} \right). \quad (\text{S37})$$

## 543 5.2 Transformation of migration rates to dispersal rates

544 Migration rates inferred under a discrete model can be transformed to dispersal distances  
 545 representing parameters in continuous space. Here, we derive the transformation.

546 **Lemma 5.4** *Consider a random walk on a 2D grid, where steps are taken according to a*  
 547 *Poisson process with rate  $m$ , and let  $\underline{X}(t)$  be a vector denoting the coordinates of the particle*  
 548 *at time  $t$ . The distribution of  $\underline{X}(t)$  approximately only depends on the compound parameter*  
 549  *$m(\Delta x)^2$  (or equivalently  $\sqrt{m}\Delta x$ ).*

$$\underline{X}(t) = \sum_{i=1}^{N(t)} \underline{Z}_i, \quad (\text{S38})$$

550 where  $N(t)$  is the number of steps taken by time  $t$ , and  $\underline{Z}_i$  is a random variable representing  
 551 the direction and magnitude taken at step  $i$ . Since  $X(t)$  is a sum of iid variables, a form of  
 552 the central limit theorem applies here and  $X(t)$  converges to the normal distribution (Rényi,  
 553 1960).

554 In a random walk on a triangular grid, a particle can move in one of the 6 directions  
 555 (upper-right, right, lower-right, left, upper-left, and lower-left):

$$\begin{aligned} \underline{Z}_i &= (1/2, \Delta x \sqrt{3}/2)^T \text{ with } p = 1/6 \\ &= (\Delta x, 0)^T \text{ with } p = 1/6 \\ &= (\Delta x/2, -\Delta x \sqrt{3}/2)^T \text{ with } p = 1/6 \\ &= (-\Delta x, 0)^T \text{ with } p = 1/6 \\ &= (-\Delta x/2, \Delta x \sqrt{3}/2)^T \text{ with } p = 1/6 \\ &= (-\Delta x/2, -\Delta x \sqrt{3}/2)^T \text{ with } p = 1/6 \end{aligned}$$

556 where  $\Delta x$  represents the step size in the grid (i.e. edge length). The mean and variance are  
 557 given by,

$$E[\underline{X}(t)] = 0 \quad (\text{S39})$$

558 and,

$$\text{Var}[\underline{X}(t)] = \frac{mt(\Delta x)^2}{2} I_2. \quad (\text{S40})$$

559 where  $I_2$  is the identity matrix. Under normality, the mean and variance are sufficient  
560 statistics. Note that (S39) and (S40) also hold for square grids.

### 561 Interpretation of the migration diffusion parameter $m(\Delta x)^2$

562 In addition, we provide a physical interpretation to  $(\Delta x)^2$  in terms of the squared distance  
563 from the origin per generation. Let the distance  $d = \|\underline{X}(t)\| = \sqrt{x_1^2 + x_2^2}$ , then

$$E[d^2]/t = E[x_1^2 + x_2^2]/t = E[x_1^2]/t + E[x_2^2]/t = \frac{m(\Delta x)^2}{2} + \frac{m(\Delta x)^2}{2} = m(\Delta x)^2. \quad (\text{S41})$$

564  $\sqrt{\frac{E[d^2]}{t}} = \sqrt{m}\Delta x$  can be interpreted as the distance traveled by an individual after  
565 one generation, and sometimes is called the “dispersal” distance or the “root mean square  
566 distance”.

### 567 5.3 Diversity rates versus coalescent rates

568 For computational efficiency, the EEMS software uses a combination of the resistance dis-  
569 tance model and within-deme “diversity rates” to approximate expected pairwise coalescent  
570 times, in which,

$$E[\hat{T}_{\alpha,\beta}] = \begin{cases} \frac{R_{\alpha,\beta}}{4} + \frac{e_{q_\alpha} + e_{q_\beta}}{2} & \text{if } \alpha \neq \beta \\ e_{q_\alpha} & \text{if } \alpha = \beta \end{cases}. \quad (\text{S42})$$

where  $E[\hat{T}_{\alpha,\beta}]$  is the resistance distance approximation to the expected coalescent time be-  
tween deme  $\alpha$  and deme  $\beta$ ,  $e_{q_\alpha}$  is the “diversity rate” in deme  $\alpha$ , and  $R_{\alpha,\beta}$  is the resistance  
distance between demes  $\alpha, \beta$  (Petkova et al., 2016). The diversity rates have no simple ex-  
pression in terms of population-genetic parameters under the multi-deme coalescent model.  
As an alternative, diversity rates can be interpreted as reflecting average within deme het-  
erozygosity since  $e_q = E[\hat{T}_w] \propto H_\alpha$  where the heterozygosity for deme  $\alpha$  ( $H_\alpha$ ) is defined

as,

$$H_\alpha = \frac{1}{\binom{n_\alpha}{2}} \sum_{i < j, i \in \alpha, j \in \alpha} D_{i,j}, \quad (\text{S43})$$

571 where  $D_{i,j}$  is the average number of differences between (haploid) individuals  $i$  and  $j$ .

## 572 Migration and population sizes are identifiable in MAPS

573 MAPS models the recombination process using rates estimated from a recombination rate  
574 map. In this model, population sizes and migration rates can be inferred separately rather  
575 than as a joint parameter. Intuitively, the recombination rate serves an independent clock  
576 to calibrate estimates.

577 More formally, a statement of identifiability is a statement regarding the likelihood.  
578 MAPS models the expected number of IPSC segments shared between pairs of (haploid)  
579 individuals, and can be computed with an integral (14). The integral can be broken up into  
580 a product of two functions: a function describing the decay of PSC segments as a function of  
581 time (“recombination rate clock”), and the coalescent time probability density  $f_{T_{i,j}}(t)$  (15).  
582 The migration rates and population sizes only appear in  $f_{T_{i,j}}(t)$ , and cannot be cannot be  
583 factored into parameters involving combinations of the migration rates and population sizes.

## 584 5.4 The prior

585 The structure of the prior closely resembles the prior in the EEMS method [Petkova et al.](#)  
586 (2016). The tessellation for the migration rates ( $T_m$ ) is encoded by a list  $(\underline{l}^m, \underline{m}, c_m, \mu_m)$   
587 where  $\underline{l}^m$  are the locations of each cell,  $\underline{m}$  the rates of each cell, and are vectors of length  
588  $c_m$  (i.e. number of Voronoi cells), and  $\mu_m$  is the overall mean migration rate. The Voronoi  
589 tessellation for the coalescent rates is  $T_q = (\underline{l}^q, \underline{q}, c_q, \mu_q)$ .

590 The location of each (unordered) Voronoi cell is distributed uniformly across the habitat,

$$l_c^m \stackrel{iid}{\sim} U(H), \quad (\text{S44})$$

591 and the number of cells (a-priori) are drawn from a negative binomial distribution,

$$c_m \sim \text{NegBi}(r_m, p_m). \quad (\text{S45})$$

592 The effects of each Voronoi cell is normally distributed with variance  $\omega^2$ .

$$\log_{10}(m_i) \stackrel{iid}{\sim} N(\mu_m, \omega_m^2) \quad (\text{S46})$$

$$\log_{10}(q_i) \stackrel{iid}{\sim} N(\mu_q, \omega_q^2) \quad (\text{S47})$$

593 The probability of a particular (unordered) cell configuration is,

$$p(\underline{m}|c_m) = c_m! \prod_{i=1}^{c_m} N(m_i|\mu_m, \omega_m^2) \quad (\text{S48})$$

594 We assume,

$$\log_{10}(\omega_m) \sim U(-3, \log_{10}(1.5)) \quad (\text{S49})$$

$$\log_{10}(\omega_q) \sim U(-3, \log_{10}(1)) \quad (\text{S50})$$

595 We set  $\log_{10}(2)$  as the upper bound for  $\log_{10}(\omega_m)$  so the  $m$  so the probability that it is within  
596 3 orders of magnitude from the mean is 0.95 a priori, and we set  $\log_{10}(1)$  as the upper bound  
597 for  $\log_{10}(\omega_q)$  to restrict the population sizes so to be within 2 orders of magnitude from the  
598 mean with probability 0.95 a priori.

599 We assume,

$$\mu_m \sim U(-10, 4) \quad (\text{S51})$$

$$\mu_q \sim U(-10, 4). \quad (\text{S52})$$

600 We place a uniform prior on the log of the mean rates to reflect that we are uncertain about  
601 the order of magnitude. Here, the data is highly informative of the mean, as a result, we  
602 can allow the support of the prior to vary by many orders of magnitude.

## 603 **5.5 MCMC**

### 604 **Re-parameterization**

605 We re-parameterize the model to improve mixing of the MCMC. We decouple the migration  
606 (or coalescent) rates from the mean rate ( $\mu$ ), and variance ( $\omega$ ) by introducing a new variable  
607  $e_i$ ,

$$e_i \stackrel{iid}{\sim} N(0, 1) \quad (\text{S53})$$

608 and the cell specific migration (or coalescent) rates are computed as,

$$\log_{10}(m_i) = e_i\omega + \mu, \quad (\text{S54})$$

609 which allows us to update the magnitude of the parameters ( $\mu$ ) and the variance scale ( $\omega$ )  
610 separately.

611 We add MH joint random-walk updates to  $\mu$  and  $e_i$  to ensure that  $\bar{e} = \frac{\sum_i e_i}{c} \approx 0$ . To do  
612 this, we jointly update  $\mu$  and  $e_i$  by,

$$\mu' = \mu + \epsilon \quad (\text{S55})$$

$$e'_i = e_i - \frac{\epsilon}{\omega} \quad (\text{S56})$$

613 where  $\epsilon \sim N(0, 1)$ . We do this for both the migration rates and population sizes.

## 614 Updating the number of cells

615 The number of cells change the dimension of the likelihood, and a result, we must use  
616 a Reversible Jump MCMC step so that the ratio of densities in the Metropolis-Hastings  
617 acceptance ratio is well-defined (Green, 1995). We choose to update the number of cells with  
618 a birth-death update (Stephens, 2000). Fortunately, in such a case, the updates reduce to  
619 standard Metropolis-Hastings because the dimension matching constant (i.e. the "Jacobian")  
620 equals one (Petkova et al., 2016; Stephens, 2000). See equations S31 and S32 in Petkova  
621 et al. (2016) for formulas regarding the birth-death update. Here, we use nearly identical  
622 updates (with a slight modification).

623 When increasing the number of cells from  $c$  to  $c + 1$  (i.e. a birth-update), we randomly  
624 choose a location uniformly across the habitat, and the new migration is proposed from a  
625 standard normal because our cell effects are standardized. In contrast, EEMS proposes cell  
626 effects migration to be normally distributed around a cell effect at a randomly chosen point  
627 in the habitat. Here we set,  $p(\text{birth}) = p(\text{death}) = 0.5$  if the number cells  $\geq 1$ , otherwise  
628  $p(\text{birth}) = 1$ .

The acceptance ratio for a birth update (going from  $c$  cells to  $c + 1$  cells) is

$$\alpha(x, x') = \min\left(1, \frac{p(\text{death})}{p(\text{birth})} \frac{l(x')p(x')\frac{1}{c+1}}{l(x)p(x)N(e_{c+1}|0, 1)}\right), \quad (\text{S57})$$

where  $x$  denotes the current state of the MCMC,  $x'$  the proposed state,  $e_{c+1}$  is the proposed cell effect drawn from a standard normal. Conversely, in a death-update, we randomly choose one cell uniformly to kill. In this case, the acceptance ratio for a death proposal (going from

$c + 1$  cells to  $c$  cells) is

$$\alpha(x, x') = \min\left(1, \frac{p(\text{birth})}{p(\text{death})} \frac{l(x')p(x')N(e_c|0, 1)}{l(x)p(x)\frac{1}{c+1}}\right). \quad (\text{S58})$$



## 629 **6 Supplementary Figures**

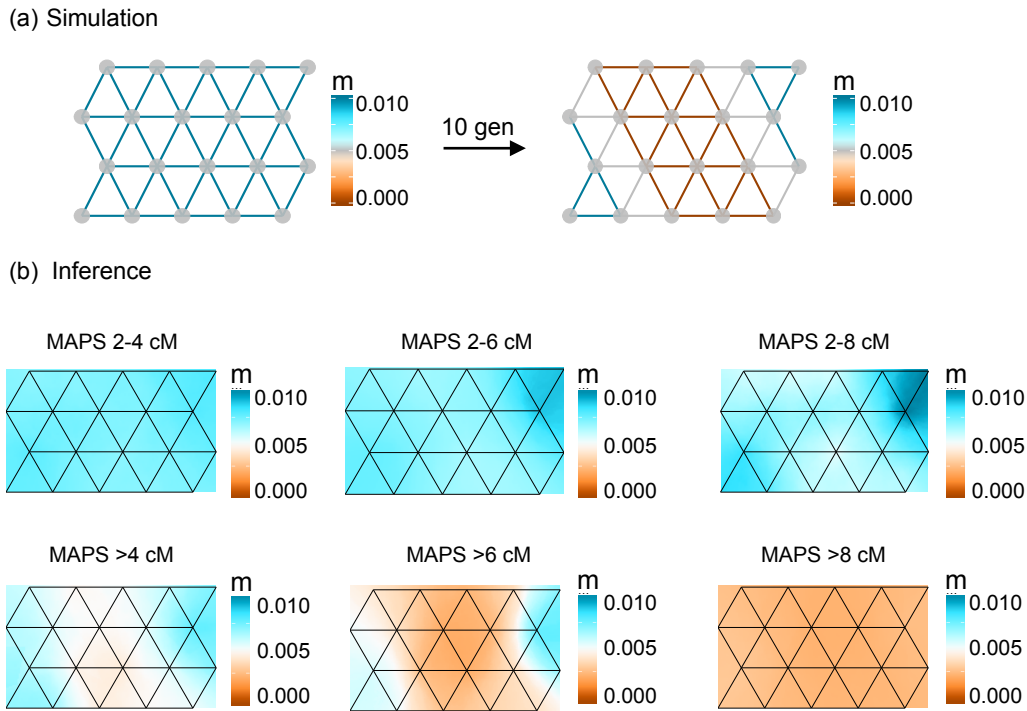

Figure S1: **The performance of MAPS on a recent barrier scenario under different PSC length bins.** Here, we investigate the ability of MAPS to detect a recent barrier ( $< 10$  generations) for various PSC length bins (a) Simulation scenario. Population sizes were set to 10,000 per deme and 10 diploids were sampled per deme, replicating the conditions in Figure 2b. (b) Results for different PSC length bins. Length bins that encompass shorter segments (2-4cM 2-6cM 2-8cM) recover the higher uniform migration surface; while length bins with longer segments ( $>4$ ,  $>6$ ,  $>8$ ) recover the recent ancestral barrier. For the last length scale ( $> 8$ cM), the signature of low migration extends across the habitat. The variation in migration rates is missed presumably because of the small number of shared segments at this length scale.

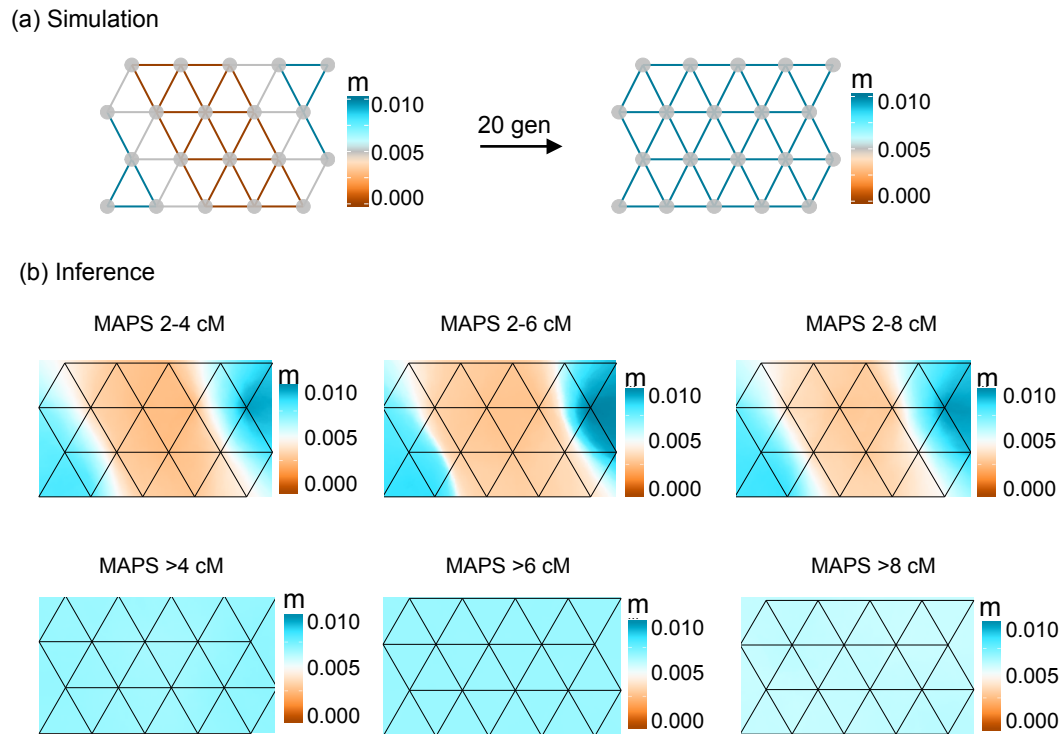

Figure S2: **The performance of MAPS on a past barrier scenario under different PSC length bins.** a) Simulation scenario. Population sizes were set to 10000 per deme and 10 diploids were sampled per deme, replicating the conditions in Figure 2c. (b) Results for different PSC length bins. Length bins that encompass shorter segments (2-4cM, 2-6cM, 2-8cM) recover the ancestral barrier; while length bins with longer segments (>4, >6, >8) recover the recent constant migration surface.

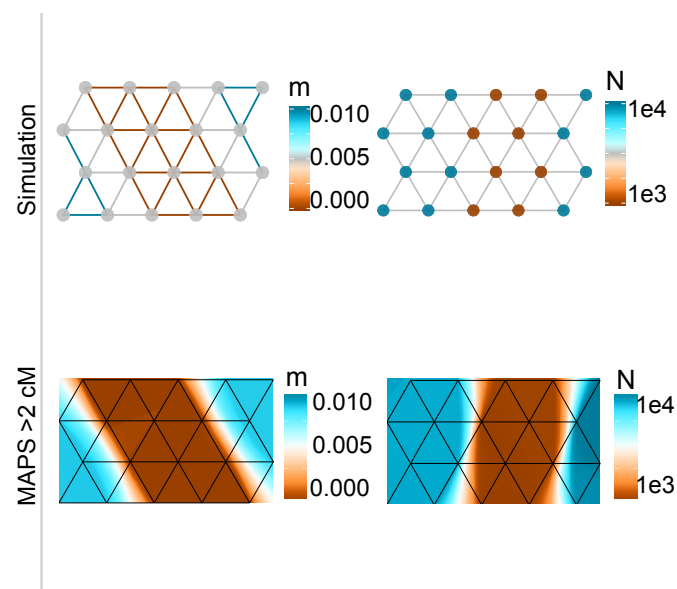

Figure S3: **The performance of MAPS under a jointly heterogeneous migration rate and population size surface.** a) Simulation Scenario. Heterogeneous population-sizes and migration rates (as shown) were simulated, and 10 diploid individuals were sampled per deme. (b) Results for PSC segments greater than 2cM are shown.

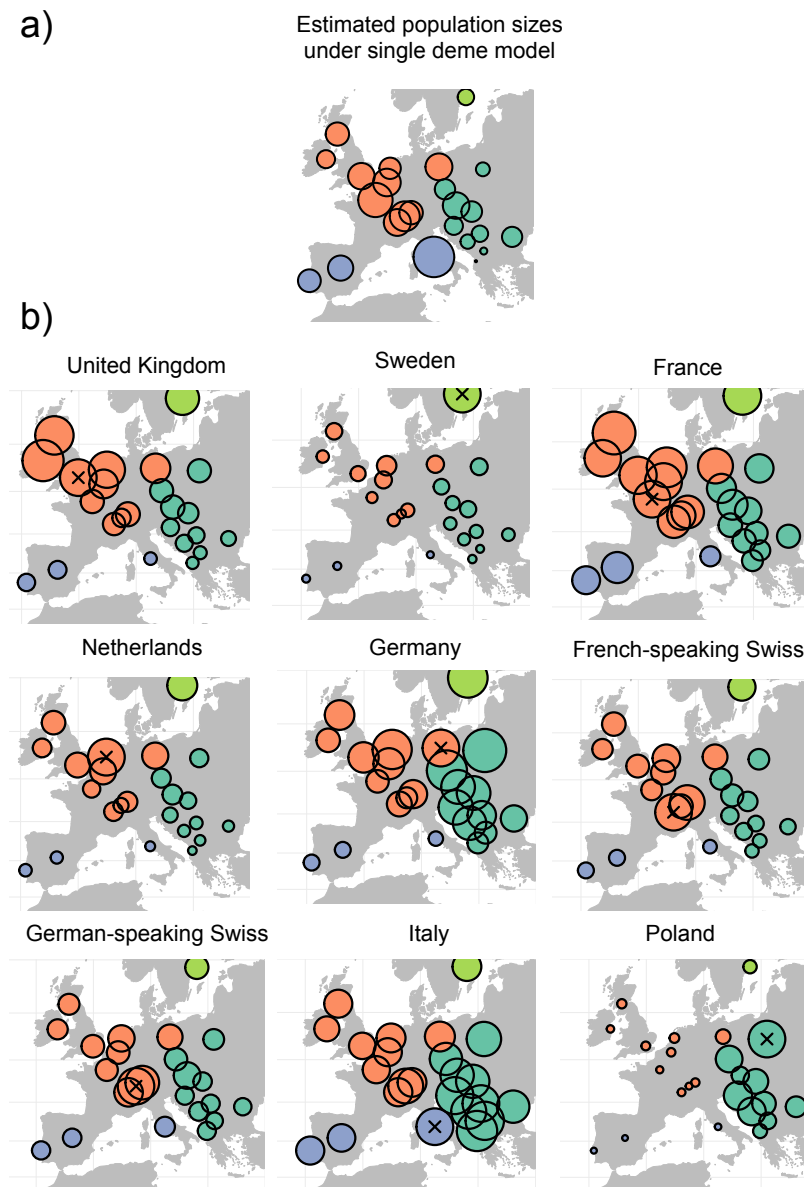

Figure S4: **Visualizing normalized sharing of PSC segments that are 1-5cM.** The color scheme is the same as used in [Ralph and Coop \(2013\)](#) where the colors give categories based on the regional groupings: W Western Europe, S Southern Europe, and E Eastern Europe (a) The average sharing within each sample locale is transformed to population sizes using the simple single deme estimator by [Palamara et al. \(2012\)](#). This transformation can be roughly summarized as to say that  $N_\alpha \propto \frac{1}{\bar{x}_{\alpha,\alpha}}$  where  $N_\alpha$  is the effective population size in deme  $\alpha$  and  $\bar{x}_{\alpha,\alpha}$  is the average pairwise PSC sharing between individuals in deme  $\alpha$ . (b) Similar to [Ralph and Coop \(2013\)](#), for each focal population (marked with an x), we plot the normalized average pairwise sharing between that population and all others (normalized by the average sharing within the focal population), i.e. if  $\alpha$  is the focal population, we show  $\frac{\bar{x}_{\alpha,\beta}}{\bar{x}_{\alpha,\alpha}}$  for each other country  $\beta$ .

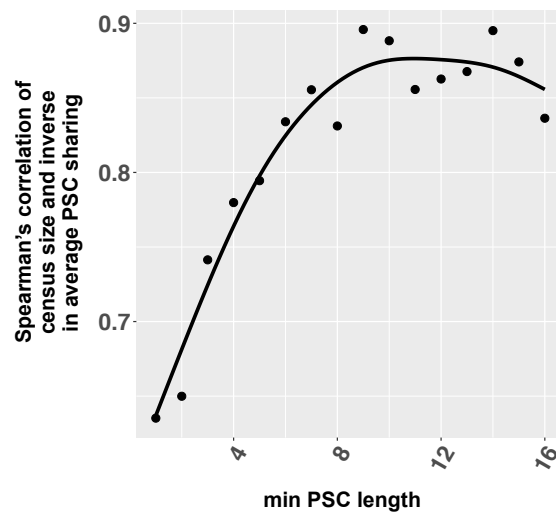

Figure S5: **The correlation between census size and inverse average PSC sharing as a function of minimum PSC length considered.** We use census size compiled from the [The World Bank \(2016\)](#) and [National Records of Scotland \(2011\)](#). The smooth black curve denotes the loess fit. Longer PSC segments correlate more strongly with census size than shorter PSC segments

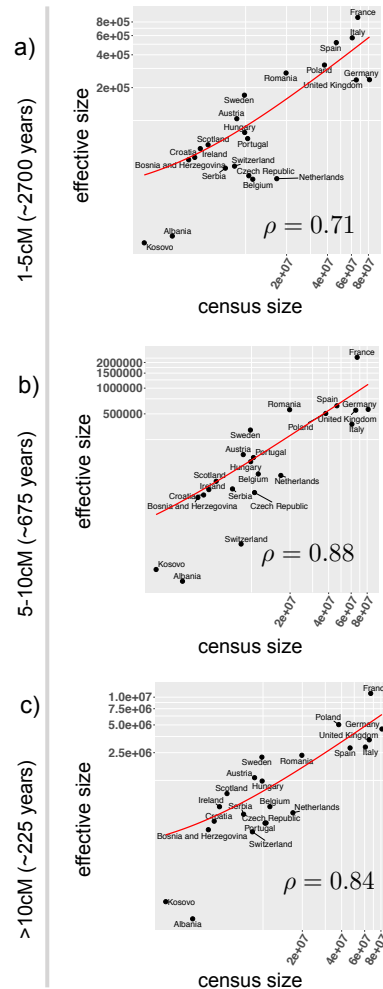

Figure S6: **Census size versus MAPS estimated population sizes.** Using the MAPS output, we estimate a total size per population by summing the estimated deme-level sizes across the area of each respective country (whether's a deme's location falls within a country was determined by querying [The GeoNames Geographical Database](#)). Finally, we plot the results on a log10 scale for different length scales (a) 1-5cM, (b) 5-10cM, and (c) >10cM. The red curve denotes the linear fit on the absolute scale. Note Kosovo and Albania as candidate outliers possibility because of cryptic relatedness artificially decreasing population sizes.

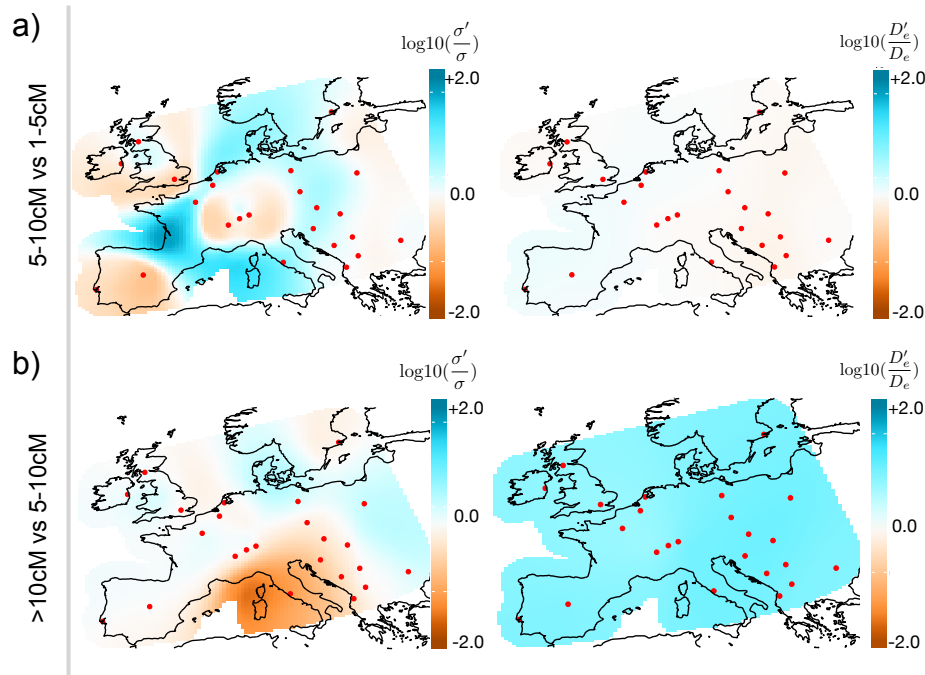

Figure S7: **Plots of estimated average log10 differences in demographic parameters between adjacent time scales.** (a) We plot estimates of  $E[\log_{10}(\frac{\sigma'}{\sigma})]$  and  $E[\log_{10}(\frac{D_e'}{D_e})]$  across the spatial habitat where  $\sigma'$  ( $D_e'$ ) denotes the dispersal rates (population densities) in the 5-10cM length bin and  $\sigma$  ( $D_e$ ) denotes the dispersal rates (population densities) in the 1-5cM length bin. (b) The results here are similarly plotted as above, however, the adjacent length scales are given by: 5-10cM and >10cM. The log10 differences are estimated in such a way so that the mean log10 difference is shrunk to zero. For example, for estimating dispersal in 5-10cM, we assume  $\log_{10}(\sigma') = E[\log_{10}(\sigma)] + \epsilon$  where  $E[\log_{10}(\sigma)]$  is estimated using PSC segments 1-5cM and  $\epsilon \sim N(0, \omega^2)$  is estimated from PSC segments 5-10cM. Consequently, the log ratio between dispersal rates from the two lengths bins is constructed to have mean zero *a priori* (i.e.  $E[\log_{10}(\frac{\sigma'}{\sigma})] = 0$ ).



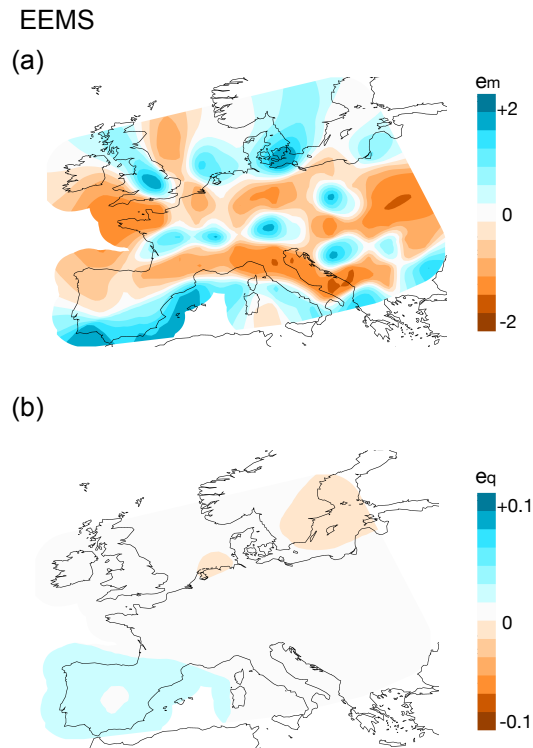

Figure S8: **EEMS applied to the POPRES dataset.** We apply EEMS to the same set of individuals as used in Figure 4 (see Methods). (a) The effective migration rates (b) The effective diversity rates. Here, we ran EEMS with 200 demes (as in Figure 4) with default parameters and averaged over 10 independent replicate chains. Each chain ran with 50e6 MCMC iterations, 25e6 set as burn-in, and we thinned every 5000 iterations.

(a)

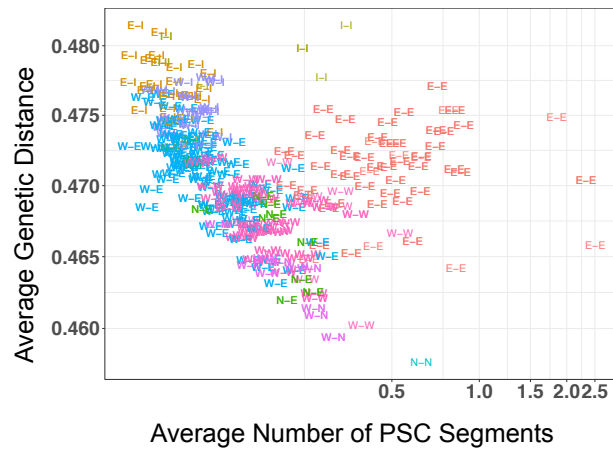

(b)

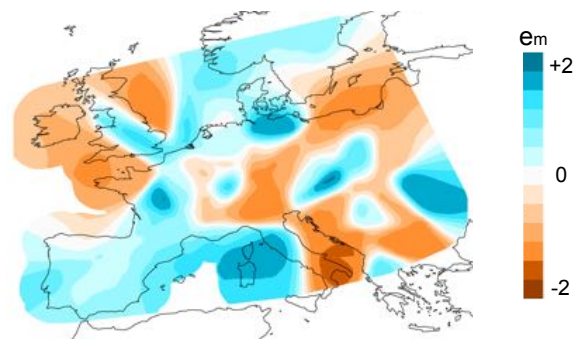

Figure S9: **Genetic distance vs PSC sharing** (a) The averaged genetic distance (as used in EEMS) is plotted against the average number of PSC segments ( $> 1\text{cM}$ ) for each pair of populations. Each point denotes a pair, the symbols represent groupings from [Ralph and Coop \(2013\)](#) (W Western Europe, S Southern Europe, and E Eastern Europe), and the colors represent the pair of regions. We see a negative correlation between the two summary statistics (Pearson's  $\rho = -0.38$ , p-value =  $7e-11$ ), with the largest deviations occurring in comparisons between Eastern European populations. (b) EEMS results on PSC data transformed to a distance matrix. First, we encoded the PSC sharing statistics into a similarity matrix  $S$  such that  $S_{i,j}$  is the number of shared PSC segments between samples  $i$  and  $j$  and  $S_{i,i}$  is the maximum number of shared segments in the dataset (which we denote as  $c$ ) to ensure  $S$  is a similarity matrix. Next, we transformed  $S$  to a genetic distance matrix  $D$  such that  $D = c11^T - S + E$  where  $E \approx 0$  is a random genetic distance matrix of normal vectors with mean 0 and standard deviation of 0.01 added to ensure  $D$  is full rank. Finally, we applied EEMS to the distance matrix  $D$ . Though this procedure is heuristic, we see shared features between this surface and the MAPS dispersal surface shown in Figure 4.

## 630 References

- 631 Soheil Baharian, Maxime Barakatt, Christopher R Gignoux, Suyash Shringarpure, Jacob  
632 Errington, William J Blot, Carlos D Bustamante, Eimear E Kenny, Scott M Williams,  
633 Melinda C Aldrich, et al. The Great Migration and African-American Genomic Diversity.  
634 *PLoS Genetics*, 12(5):e1006059, 2016.
- 635 Melanie Bahlo and Robert C Griffiths. Coalescence Time for Two Genes from a Subdivided  
636 Population. *Journal of Mathematical Biology*, 43(5):397–410, 2001.
- 637 Guido Barbujani, Neal L Oden, and Robert R Sokal. Detecting regions of abrupt change in  
638 maps of biological variables. *Systematic Zoology*, 38(4):376–389, 1989.
- 639 Nick H Barton, Frantz Depaulis, and Alison M Etheridge. Neutral Evolution in Spatially  
640 Continuous Populations. *Theoretical Population Biology*, 61(1):31–48, 2002.
- 641 Michael GB Blum, Christophe Damerval, Stephanie Manel, and Olivier François. Brownian  
642 Models and Coalescent Structures. *Theoretical Population Biology*, 65(3):249–261, 2004.
- 643 Gideon Bradburd, Graham Coop, and Peter Ralph. Inferring Continuous and Discrete  
644 Population Genetic Structure across Space. *bioRxiv*, page 189688, 2017.
- 645 Gideon S Bradburd, Peter L Ralph, and Graham M Coop. A Spatial Framework for Under-  
646 standing Population Structure and Admixture. *PLoS Genet*, 12(1):e1005703, 2016.
- 647 Brian L Browning and Sharon R Browning. A Fast, Powerful Method for Detecting Identity-  
648 by-Descent. *The American Journal of Human Genetics*, 88(2):173–182, 2011.
- 649 Brian L Browning and Sharon R Browning. Improving the Accuracy and Efficiency of  
650 Identity-by-Descent Detection in Population Data. *Genetics*, 194(2):459–471, 2013.
- 651 Kevin Caye, Flora Jay, Olivier Michel, and Olivier Francois. Fast Inference of Individual  
652 Admixture Coefficients Using Geographic Data. *bioRxiv*, page 080291, 2016.
- 653 Gary K Chen, Paul Marjoram, and Jeffrey D Wall. Fast and flexible simulation of DNA  
654 sequence data. *Genome Research*, 19(1):136–142, 2009.
- 655 Charleston WK Chiang, Joseph H Marcus, Carlo Sidore, Hussein Al-Asadi, Magdalena  
656 Zoledziewska, Maristella Pitzalis, Fabio Busonero, Andrea Maschio, Giorgio Pistis, Maris-  
657 tella Steri, et al. Population History of the Sardinian People Inferred from Whole-Genome  
658 Sequencing. *bioRxiv*, page 092148, 2016.

- 659 Joel E Cohen. Population Growth and Earth's Human Carrying Capacity. *Science*, 269  
660 (5222):341–346, 1995.
- 661 Peter J Green. Reversible Jump Markov Chain Monte Carlo Computation and Bayesian  
662 Model Determination. *Biometrika*, 82(4):711–732, 1995.
- 663 Gilles Guillot, Frédéric Mortier, and Arnaud Estoup. GENELAND: A Computer Package  
664 for Landscape Genetics. *Molecular Ecology Resources*, 5(3):712–715, 2005.
- 665 Gilles Guillot, Raphael Leblois, Aurelie Coulon, and Alain C Frantz. Statistical Methods in  
666 Spatial Genetics. *Molecular Ecology*, 18(23):4734–4756, 2009.
- 667 Alexander Gusev, Jennifer K Lowe, Markus Stoffel, Mark J Daly, David Altshuler, Jan L  
668 Breslow, Jeffrey M Friedman, and Itsik Pe'er. Whole Population, Genome-Wide Mapping  
669 of Hidden Relatedness. *Genome Research*, 19(2):318–326, 2009.
- 670 Jotun Hein, Mikkel Schierup, and Carsten Wiuf. *Gene Genealogies, Variation and Evolution:  
671 A Primer in Coalescent Theory*. Oxford University Press, USA, 2004.
- 672 Joanna Kaplanis, Assaf Gordon, Tal Shor, Omer Weissbrod, Dan Geiger, Mary Wahl,  
673 Michael Gershovits, Barak Markus, Mona Sheikh, Melissa Gymrek, et al. Quantitative  
674 analysis of population-scale family trees with millions of relatives. *Science*, (early online):  
675 eaam9309, 2018.
- 676 Oscar Lao, Timothy T Lu, Michael Nothnagel, Olaf Junge, Sandra Freitag-Wolf, Amke  
677 Caliebe, Miroslava Balascakova, Jaume Bertranpetit, Laurence A Bindoff, David Comas,  
678 et al. Correlation between Genetic and Geographic Structure in Europe. *Current Biology*,  
679 18(16):1241–1248, 2008.
- 680 Daniel John Lawson, Garrett Hellenthal, Simon Myers, and Daniel Falush. Inference of  
681 Population Structure using Dense Haplotype Data. *PLoS Genetics*, 8(1):e1002453, 2012.
- 682 Stephen Leslie, Bruce Winney, Garrett Hellenthal, Dan Davison, Abdelhamid Boumertit,  
683 Tammy Day, Katarzyna Hutnik, Ellen C Royrvik, Barry Cunliffe, Daniel J Lawson, et al.  
684 The Fine-Scale Genetic Structure of the British Population. *Nature*, 519(7543):309–314,  
685 2015.
- 686 Heng Li and Richard Durbin. Inference of Human Population History from Individual Whole-  
687 Genome Sequences. *Nature*, 475(7357):493–496, 2011.

- 688 Stéphanie Manel, Michael K Schwartz, Gordon Luikart, and Pierre Taberlet. Landscape  
689 Genetics: Combining Landscape Ecology and Population Genetics. *Trends in Ecology &*  
690 *Evolution*, 18(4):189–197, 2003.
- 691 Brad H McRae. Isolation by Resistance. *Evolution*, 60(8):1551–1561, 2006.
- 692 National Records of Scotland. Scotland’s 2011 census, 2011. census size retrieved from,  
693 <http://www.scotlandscensus.gov.uk/statistical-bulletins>.
- 694 Matthew R Nelson, Katarzyna Bryc, Karen S King, Amit Indap, Adam R Boyko, John  
695 Novembre, Linda P Briley, Yuka Maruyama, Dawn M Waterworth, Gérard Waeber, et al.  
696 The Population Reference Sample, POPRES: A Resource for Population, Disease, and  
697 Pharmacological Genetics Research. *The American Journal of Human Genetics*, 83(3):  
698 347–358, 2008.
- 699 John Novembre and Montgomery Slatkin. Likelihood-Based Inference in Isolation-by-  
700 Distance Models Using the Spatial Distribution of Low-Frequency Alleles. *Evolution*,  
701 63(11):2914–2925, 2009.
- 702 John Novembre, Toby Johnson, Katarzyna Bryc, Zoltán Kutalik, Adam R Boyko, Adam  
703 Auton, Amit Indap, Karen S King, Sven Bergmann, Matthew R Nelson, et al. Genes  
704 Mirror Geography within Europe. *Nature*, 456(7218):98–101, 2008.
- 705 Pier Francesco Palamara and Itsik Peer. Inference of historical migration rates via haplotype  
706 sharing. *Bioinformatics*, 29(13):i180–i188, 2013.
- 707 Pier Francesco Palamara, Todd Lencz, Ariel Darvasi, and Itsik Peer. Length Distributions  
708 of Identity by Descent Reveal Fine-scale Demographic History. *The American Journal of*  
709 *Human Genetics*, 91(5):809–822, 2012.
- 710 Nick Patterson, Alkes L Price, and David Reich. Population Structure and Eigenanalysis.  
711 *PLoS Genet*, 2(12):e190, 2006.
- 712 Desislava Petkova, John Novembre, and Matthew Stephens. Visualizing Spatial Population  
713 Structure with Estimated Effective Migration Surfaces. *Nat Genet*, 48(1):94–100, Jan  
714 2016. doi: 10.1038/ng.3464.
- 715 Jonathan K Pritchard, Matthew Stephens, and Peter Donnelly. Inference of Population  
716 Structure using Multilocus Genotype Data. *Genetics*, 155(2):945–959, 2000.
- 717 Peter Ralph and Graham Coop. The Geography of Recent Genetic Ancestry across Europe.  
718 *PLoS Biol*, 11(5):e1001555, 2013.

- 719 A Rényi. On the Central Limit Theorem for the Sum of a Random Number of Independent  
720 Random Variables. *Acta Mathematica Hungarica*, 11(1-2):97–102, 1960.
- 721 Harald Ringbauer, Graham Coop, and Nicholas H Barton. Inferring Recent Demography  
722 from Isolation-By-Distance of Long Shared Sequence Blocks. *Genetics*, 205(3):1335–1351,  
723 2017.
- 724 JJ Robledo-Arnuncio and Rousset. Isolation by Distance in a Continuous Population under  
725 Stochastic Demographic Fluctuations. *Journal of Evolutionary Biology*, 23(1):53–71, 2010.
- 726 Noah A Rosenberg, Saurabh Mahajan, Sohini Ramachandran, Chengfeng Zhao, Jonathan K  
727 Pritchard, and Marcus W Feldman. Clines, Clusters, and the Effect of Study Design on  
728 the Inference of Human Population Structure. *PLoS Genet*, 1(6):e70, 2005.
- 729 François Rousset. *Genetic Structure and Selection in Subdivided Populations (MPB-40)*.  
730 Princeton University Press New Jersey, 2004.
- 731 Joshua G Schraiber and Joshua M Akey. Methods and Models for Unravelling Human  
732 Evolutionary history. *Nature Reviews Genetics*, 16(12):727, 2015.
- 733 Gernot Segelbacher, Samuel A Cushman, Bryan K Epperson, Marie-Josée Fortin, Olivier  
734 Francois, Olivier J Hardy, Rolf Holderegger, Pierre Taberlet, Lisette P Waits, and  
735 Stéphanie Manel. Applications of Landscape Genetics in Conservation Biology: Concepts  
736 and Challenges. *Conservation Genetics*, 11(2):375–385, 2010.
- 737 Matthew Stephens. Bayesian Analysis of Mixture Models with an Unknown Number of  
738 Components, an Alternative to Reversible Jump Methods. *Annals of Statistics*, pages  
739 40–74, 2000.
- 740 The GeoNames Geographical Database. Geonames. Queried on July 2018, [http://www.  
741 geonames.org/](http://www.geonames.org/).
- 742 The World Bank. World development indicators, 2016. data retrieved from World Develop-  
743 ment Indicators, <https://data.worldbank.org/indicator/SP.POP.TOTL>.
- 744 Monica G Turner, Robert H Gardner, Robert V O’neill, et al. *Landscape Ecology in Theory  
745 and Practice*. Springer-Verlag New York, 2001.
- 746 Jon F Wilkins. A Separation-of-Timescales Approach to the Coalescent in a Continuous  
747 Population. *Genetics*, 168(4):2227–2244, 2004.
- 748 William H Womble. Differential systematics. *Science*, 114(2961):315–322, 1951.

749 Sewall Wright. Isolation by Distance. *Genetics*, 28(2):114, 1943.

750 Andreas Zimmermann, Johanna Hilpert, and Karl Peter Wendt. Estimations of Population  
751 Density for Selected Periods between the Neolithic and AD 1800. *Human Biology*, 81(3):  
752 357–380, 2009.
